# Supplementary material for: Stereocontrol in the synthesis of cyclic amino acids: a new ligand for directed hydrogenation through hydrogen bonding
Source: Royal Society of Chemistry journal article supplement (doi:10.1039/c9ob00003h), 2019-01-01
Supplement: c9ob00003h3.pdf [file c9ob00003h3.pdf]

**Stereocontrol in the synthesis of cyclic amino acids:  
a new ligand for directed hydrogenation through hydrogen bonding**

Vasudeva Rao Gandhi, Bao Nguyen Do Doan,  
Sivarajan Kasinathan, Roderick W. Bates\*

Division of Chemistry and Biological Chemistry, School of Physical and Mathematical Sciences,  
Nanyang Technological University, 21 Nanyang Link, Singapore 637371  
FAX +65 6791 1961 e-mail: [roderick@ntu.edu.sg](mailto:roderick@ntu.edu.sg)

<sup>1</sup>H and <sup>13</sup>C{<sup>1</sup>H} NMR spectra

| compound   | page | compound  | page |
|------------|------|-----------|------|
| <b>6</b>   | S2   | <b>13</b> | S13  |
| <b>9a</b>  | S3   | <b>17</b> | S14  |
| <b>9b</b>  | S4   | <b>18</b> | S15  |
| <b>10a</b> | S5   | <b>19</b> | S16  |
| <b>11a</b> | S6   | <b>7</b>  | S17  |
| <b>10b</b> | S7   | <b>9c</b> | S18  |
| <b>10c</b> | S8   | <b>14</b> | S19  |
| <b>10e</b> | S9   | <b>15</b> | S20  |
| <b>10f</b> | S10  | <b>1</b>  | S21  |
| <b>10g</b> | S11  | <b>3</b>  | S22  |
| <b>12</b>  | S12  |           |      |

X-ray structures and data

| compound                                 | page |
|------------------------------------------|------|
| <b>11a</b> <i>p</i> -nitrobenzoate ester | S23  |
| <b>19</b> <i>p</i> -nitrobenzoate ester  | S24  |
| Crystallographic data                    | S25  |

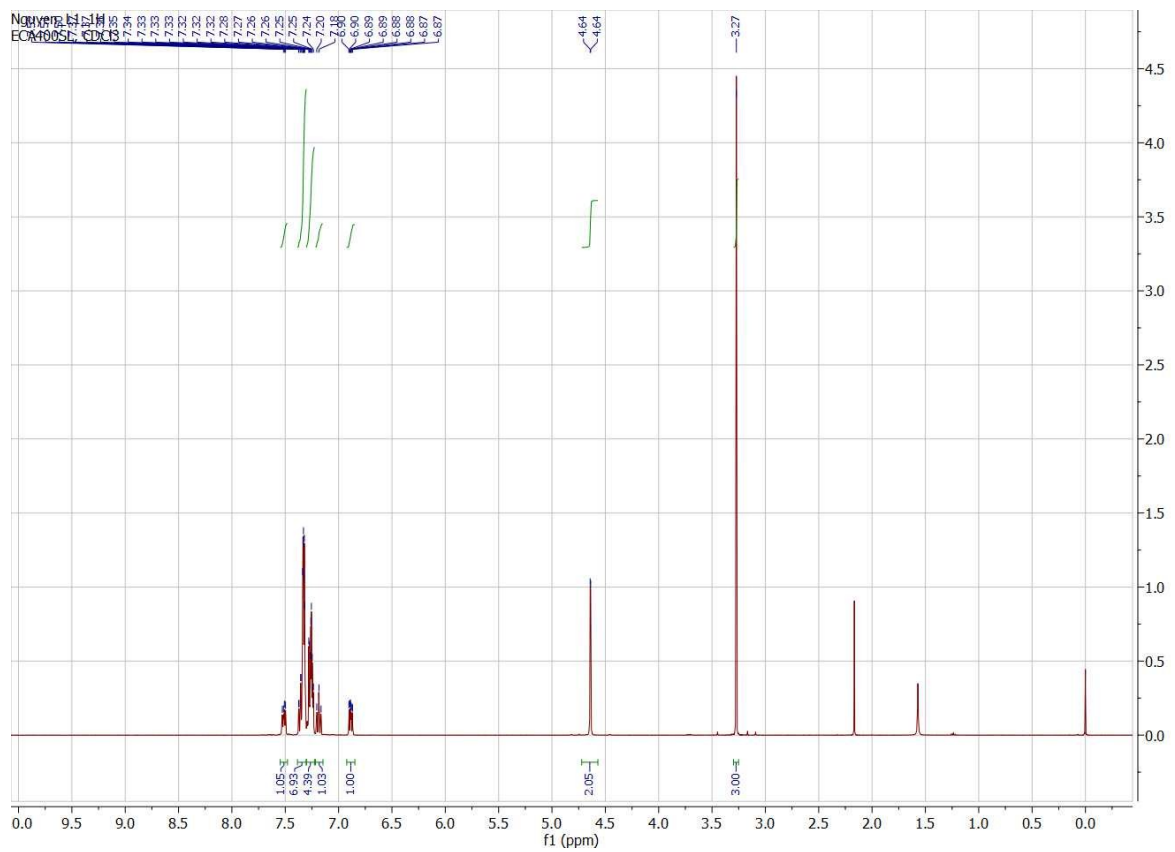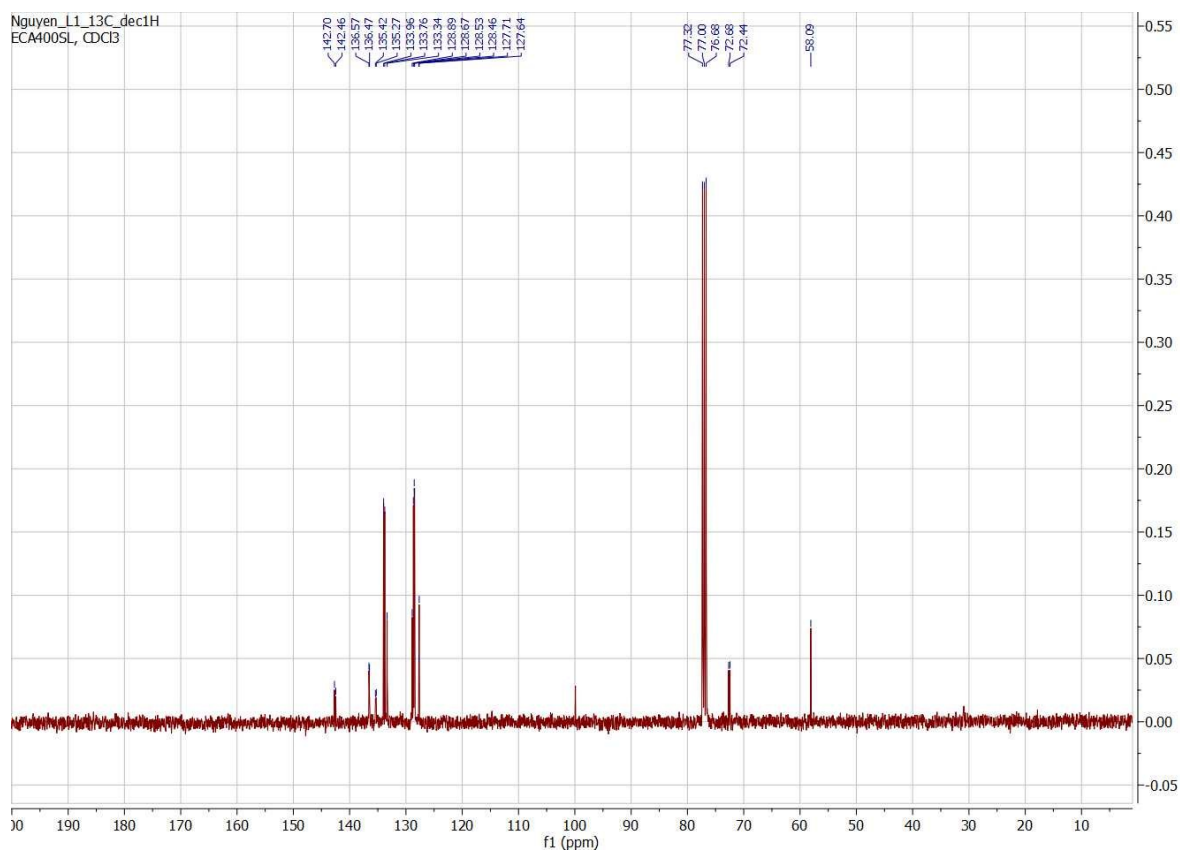

<sup>1</sup>H NMR and <sup>13</sup>C {<sup>1</sup>H} NMR spectra of ligand **6**

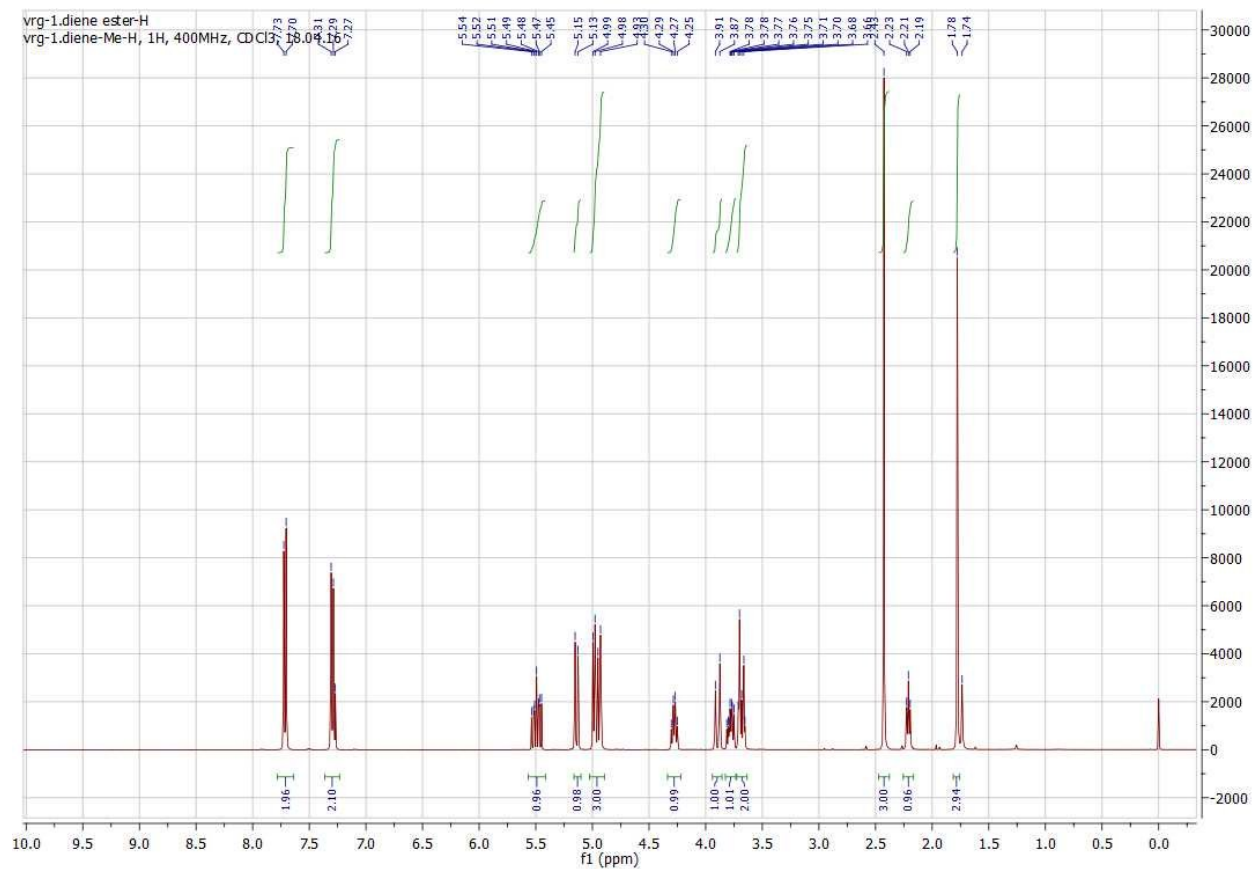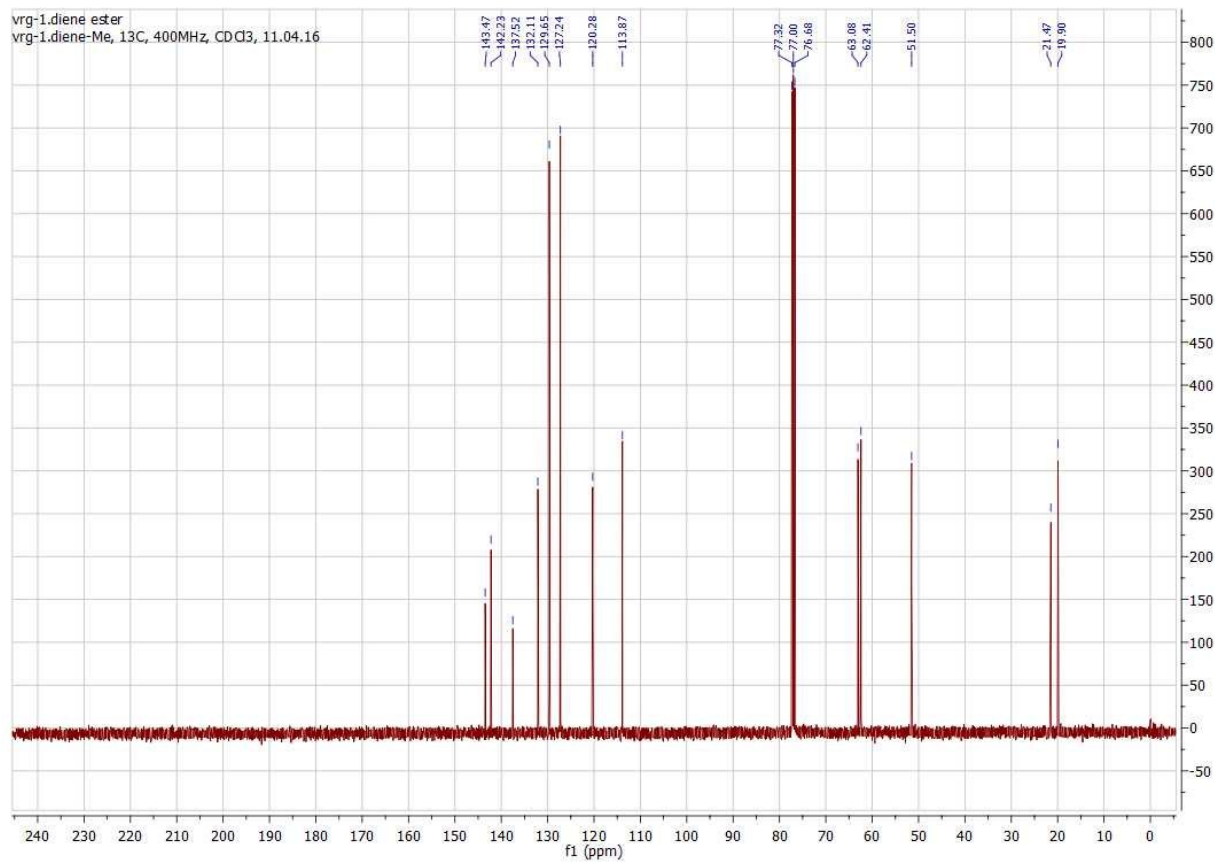

<sup>1</sup>H NMR and <sup>13</sup>C{<sup>1</sup>H} NMR spectra of **9a**



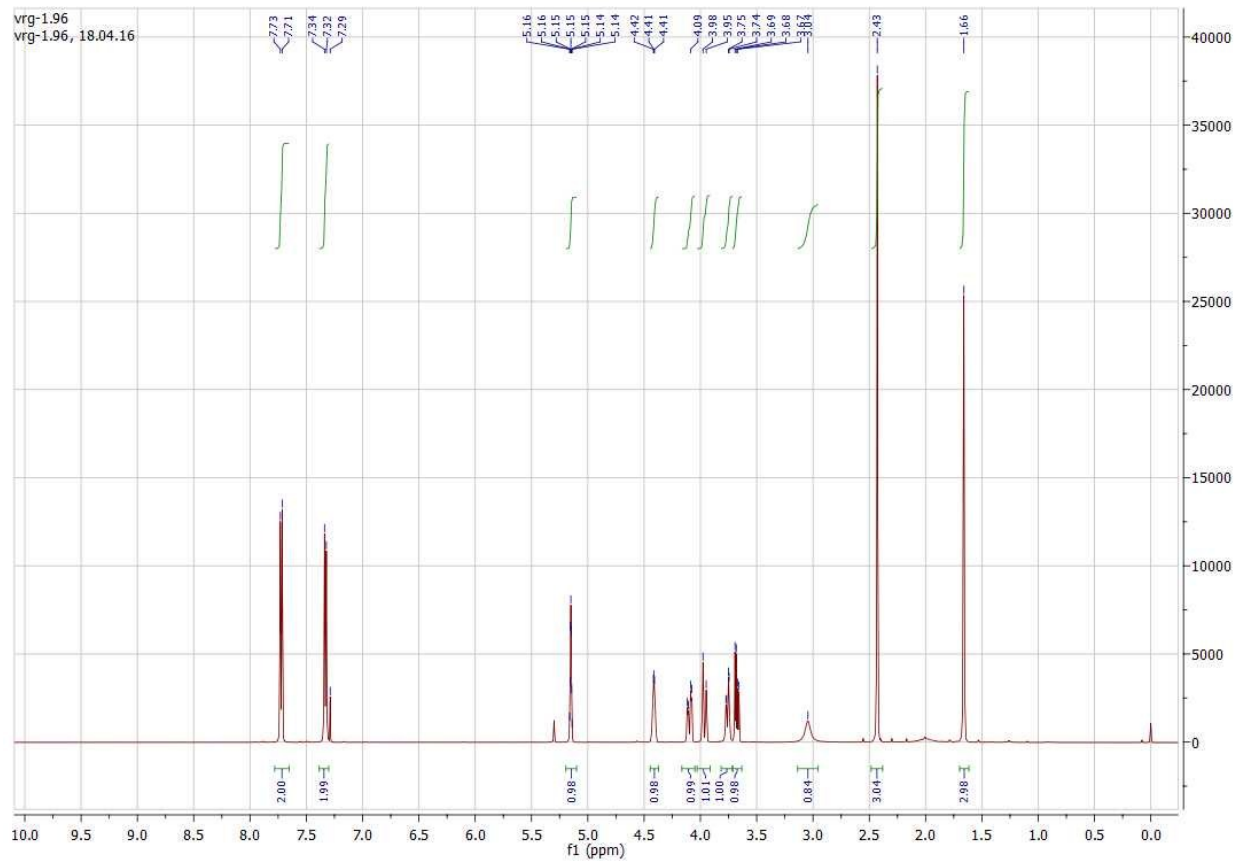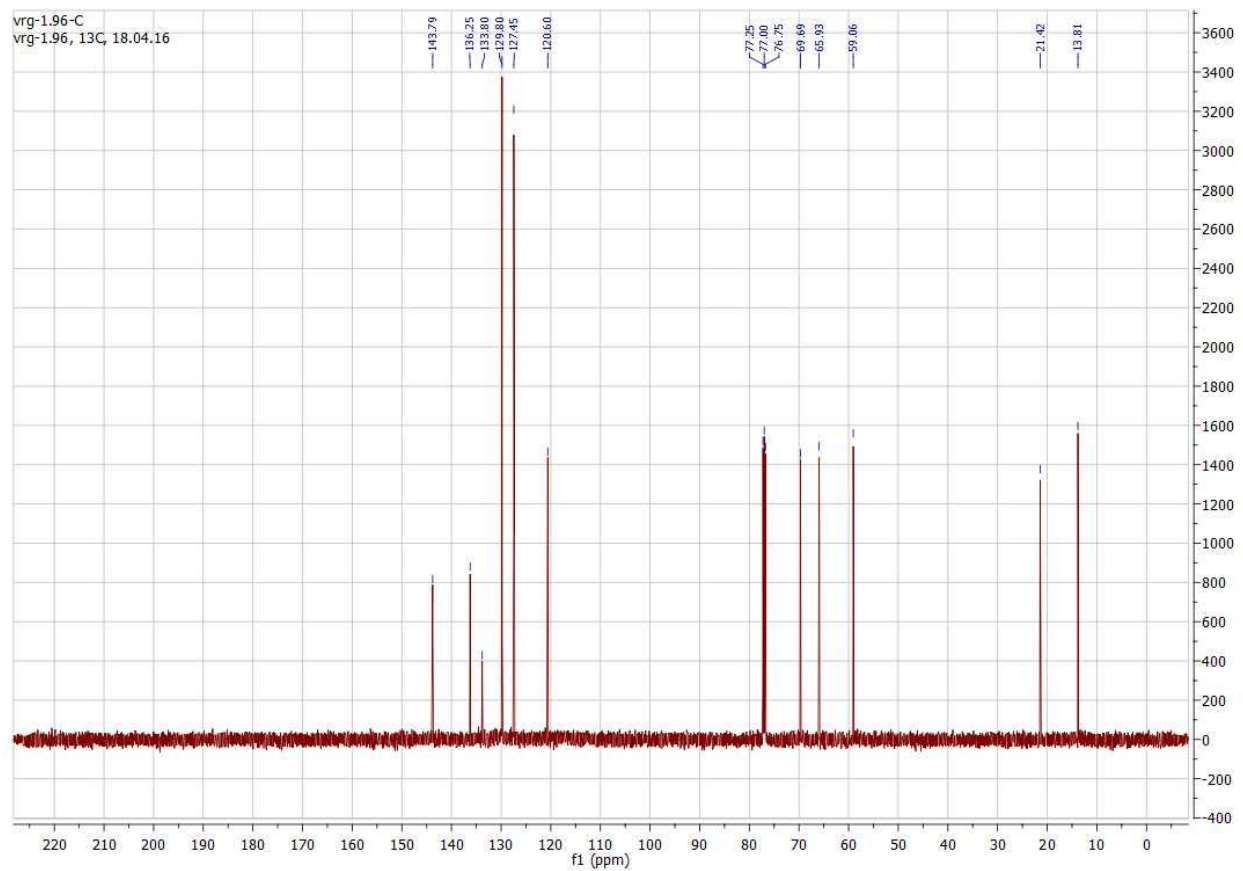

<sup>1</sup>H NMR and <sup>13</sup>C{<sup>1</sup>H} NMR spectra of **10a**

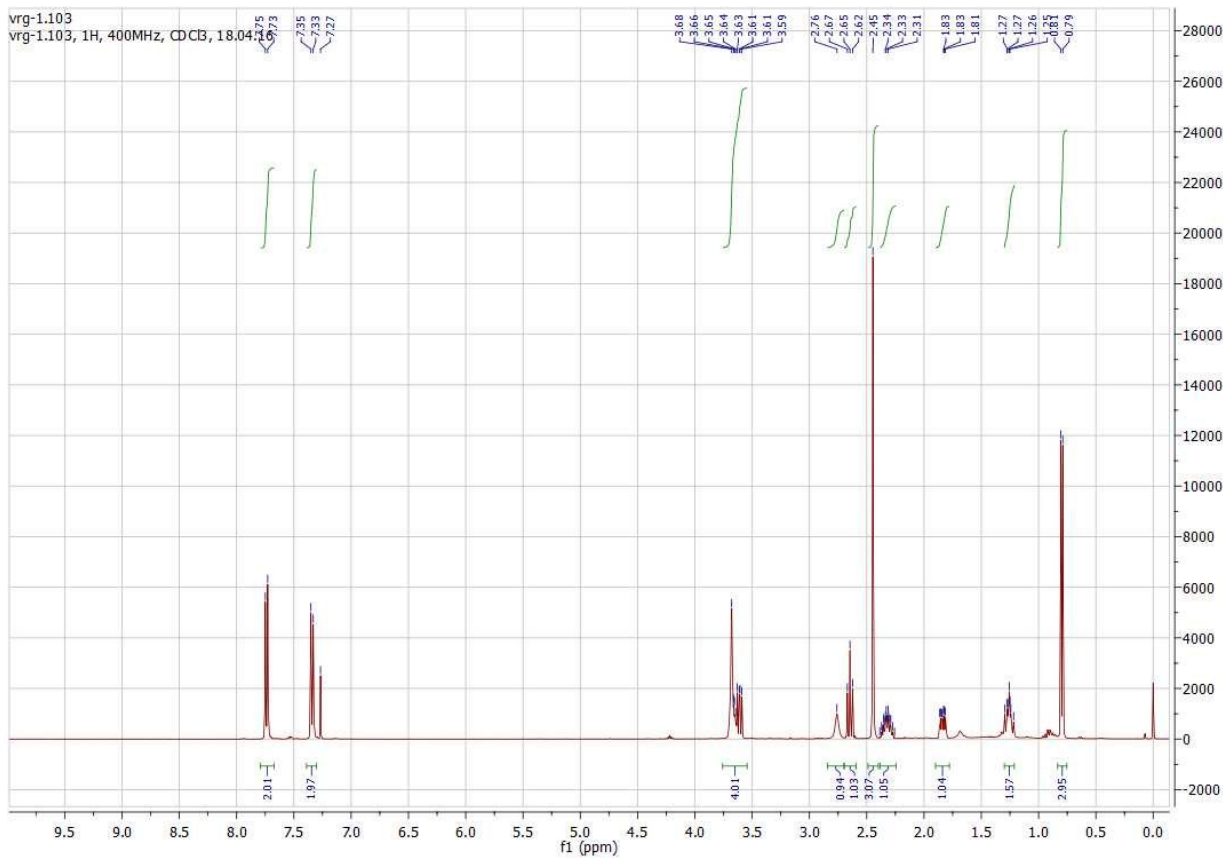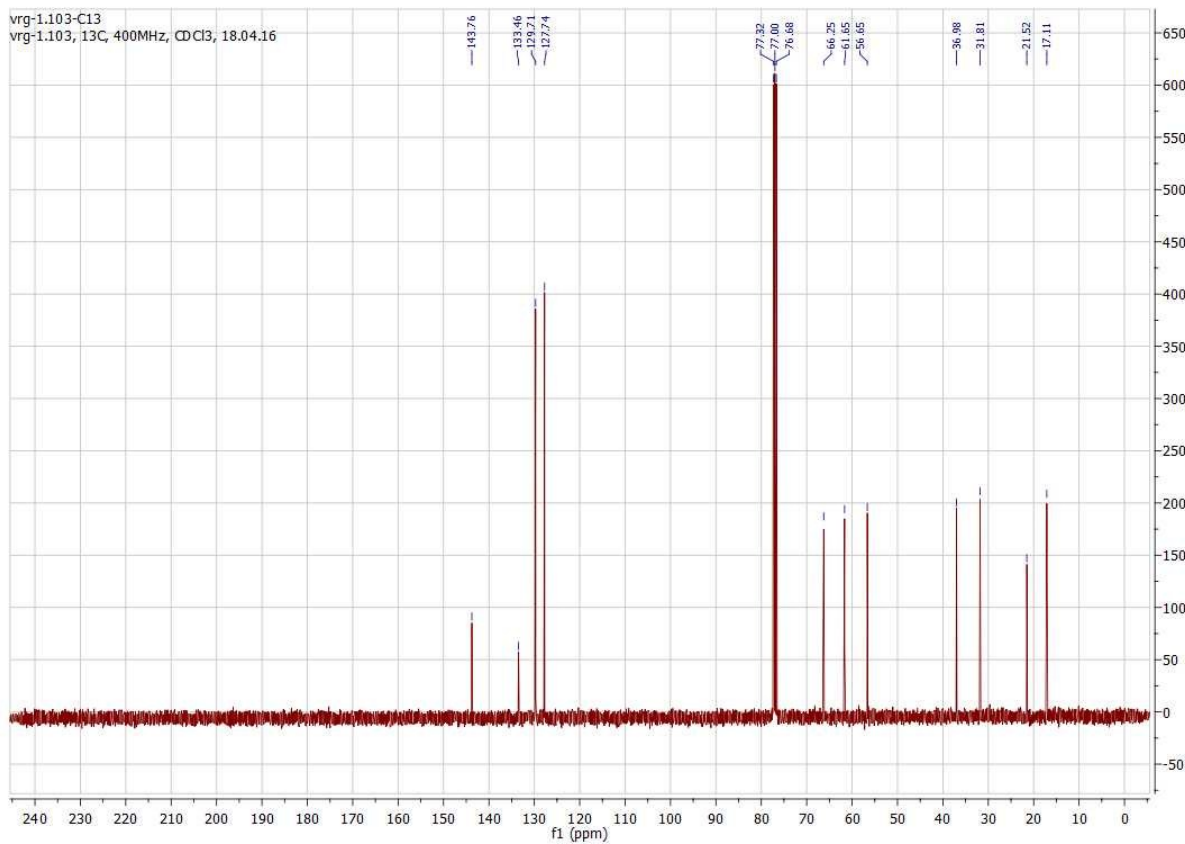

$^1\text{H}$  NMR and  $^{13}\text{C}\{^1\text{H}\}$  NMR spectra of **11a**

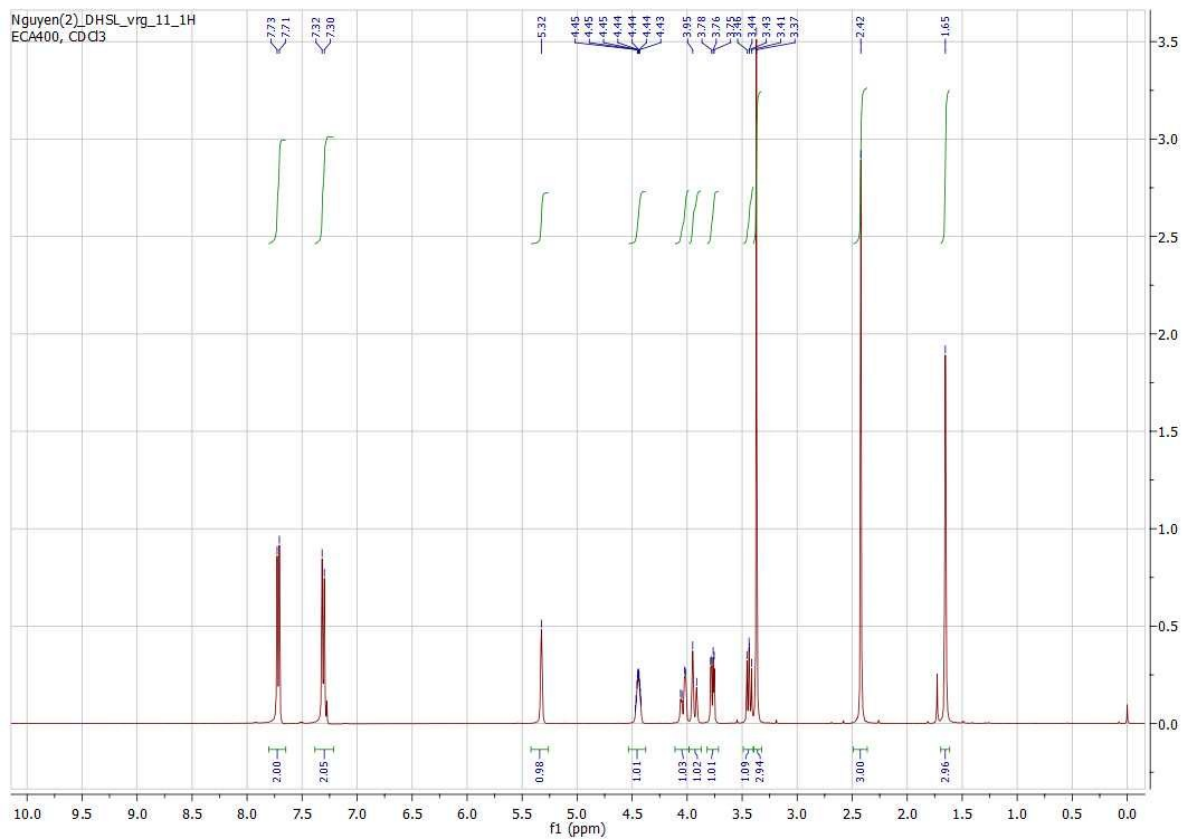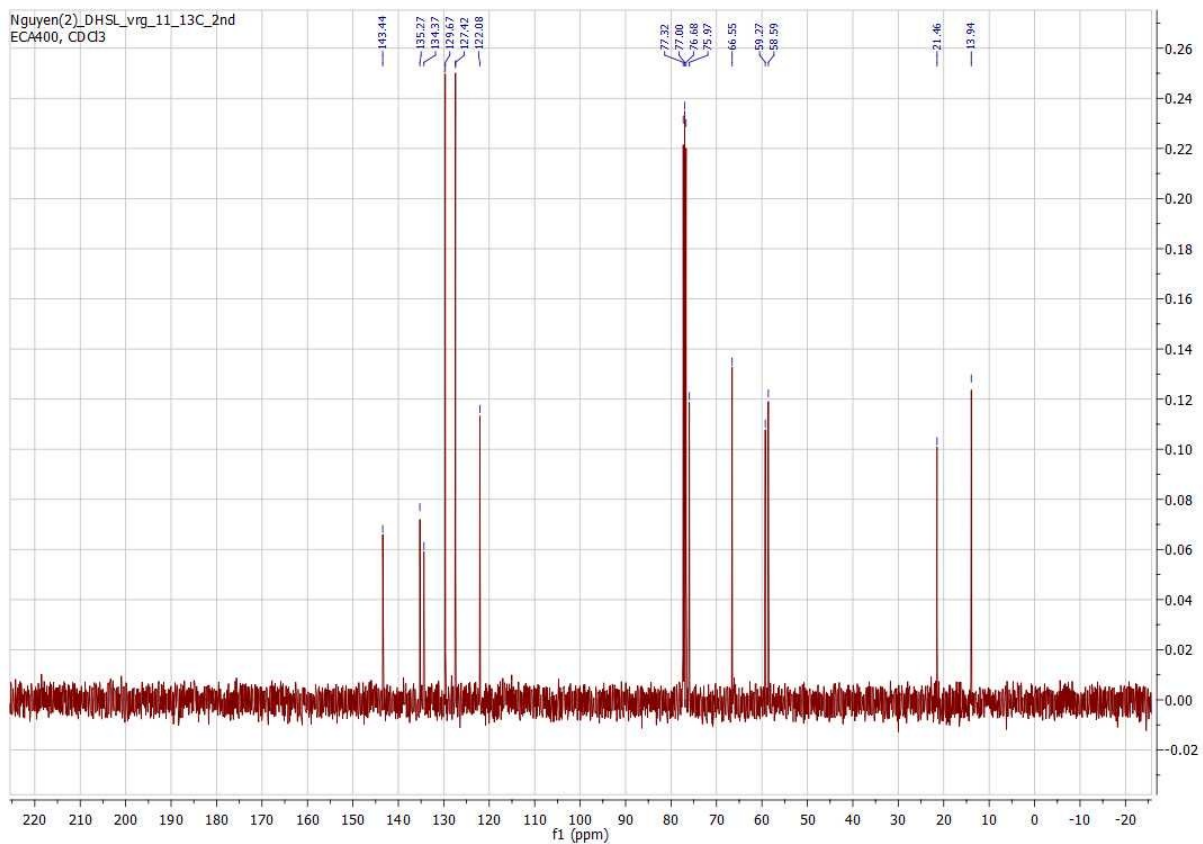

<sup>1</sup>H NMR and <sup>13</sup>C{<sup>1</sup>H} NMR spectra of **10b**

Nguyen(2)\_DHSL\_vrg\_12\_1H  
ECA400SL, CDCl3

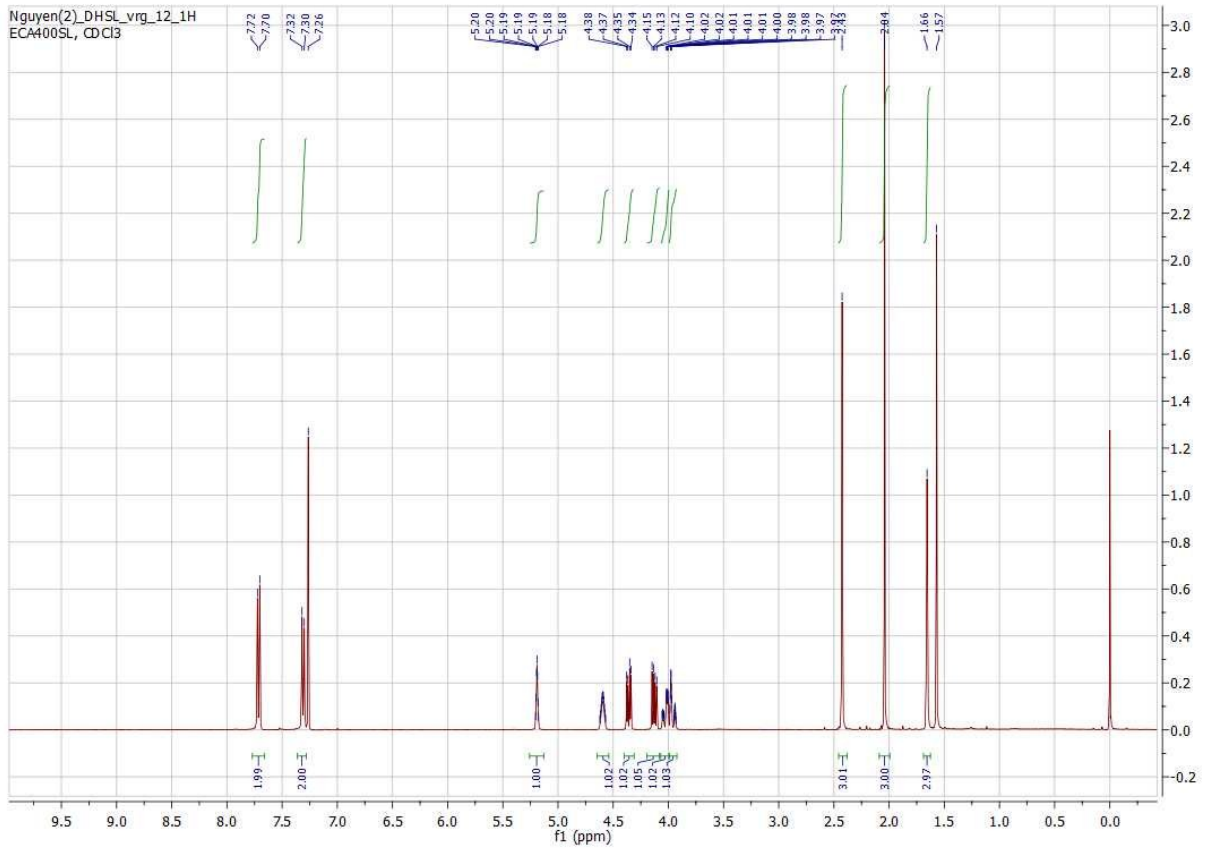



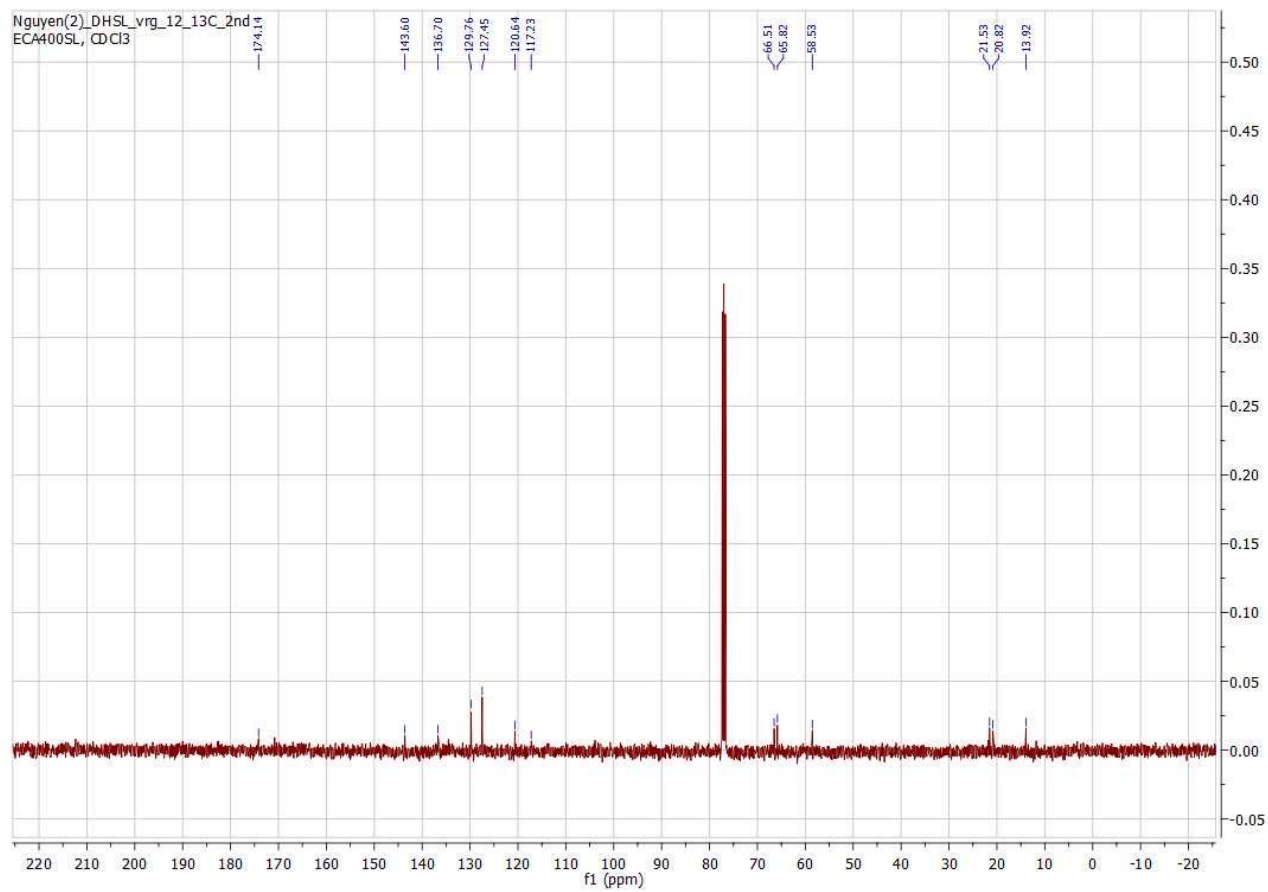

$^1\text{H}$  NMR and  $^{13}\text{C}\{^1\text{H}\}$  NMR spectra of **10c**

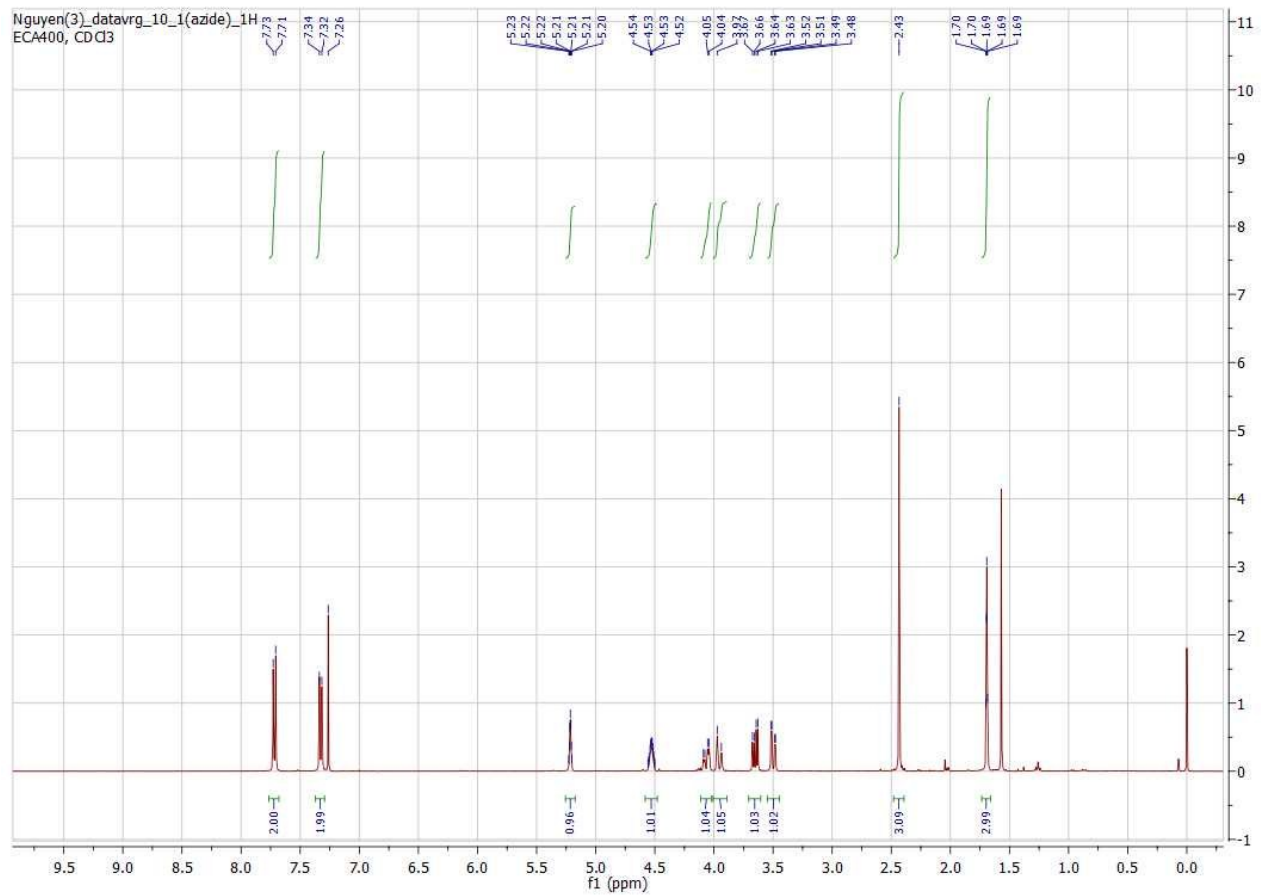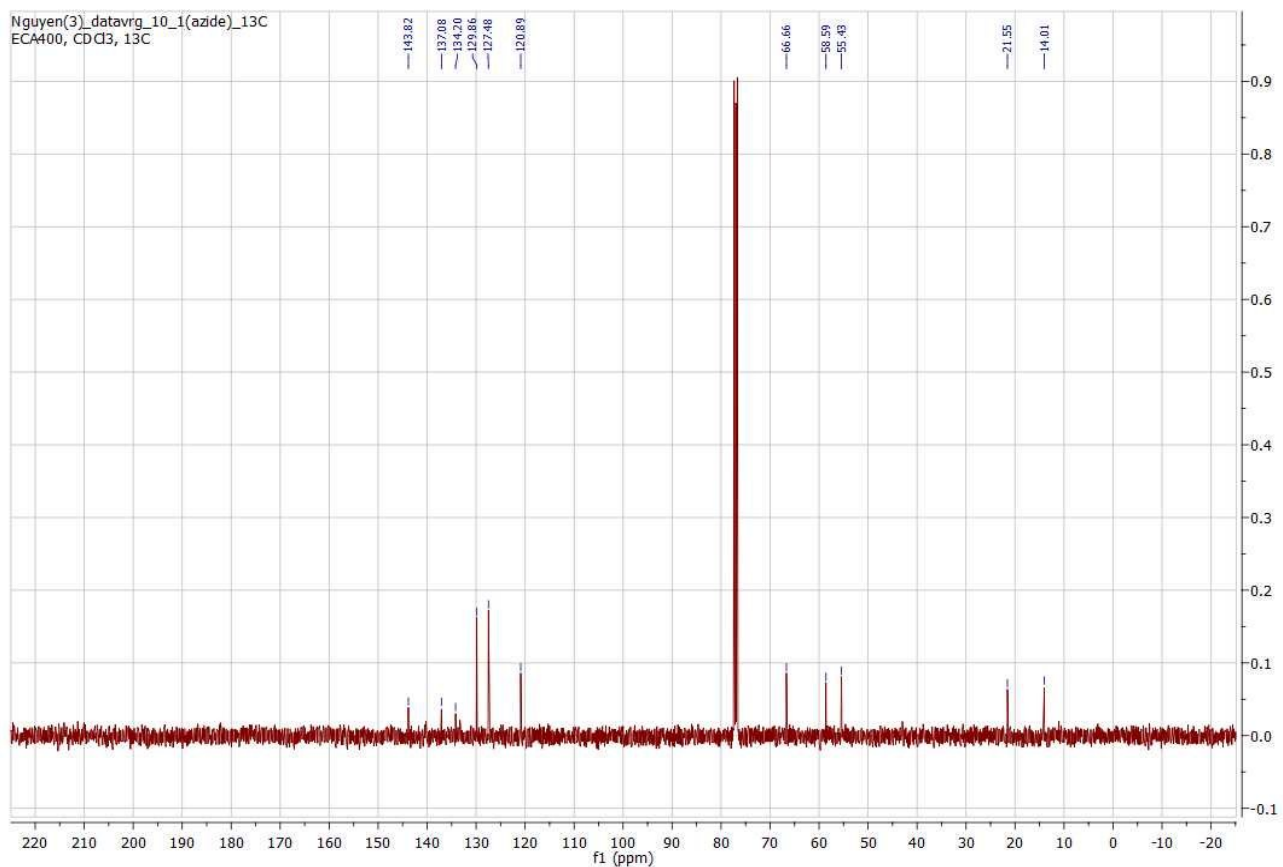

$^1\text{H}$  NMR and  $^{13}\text{C}\{^1\text{H}\}$  NMR spectra of **10e**

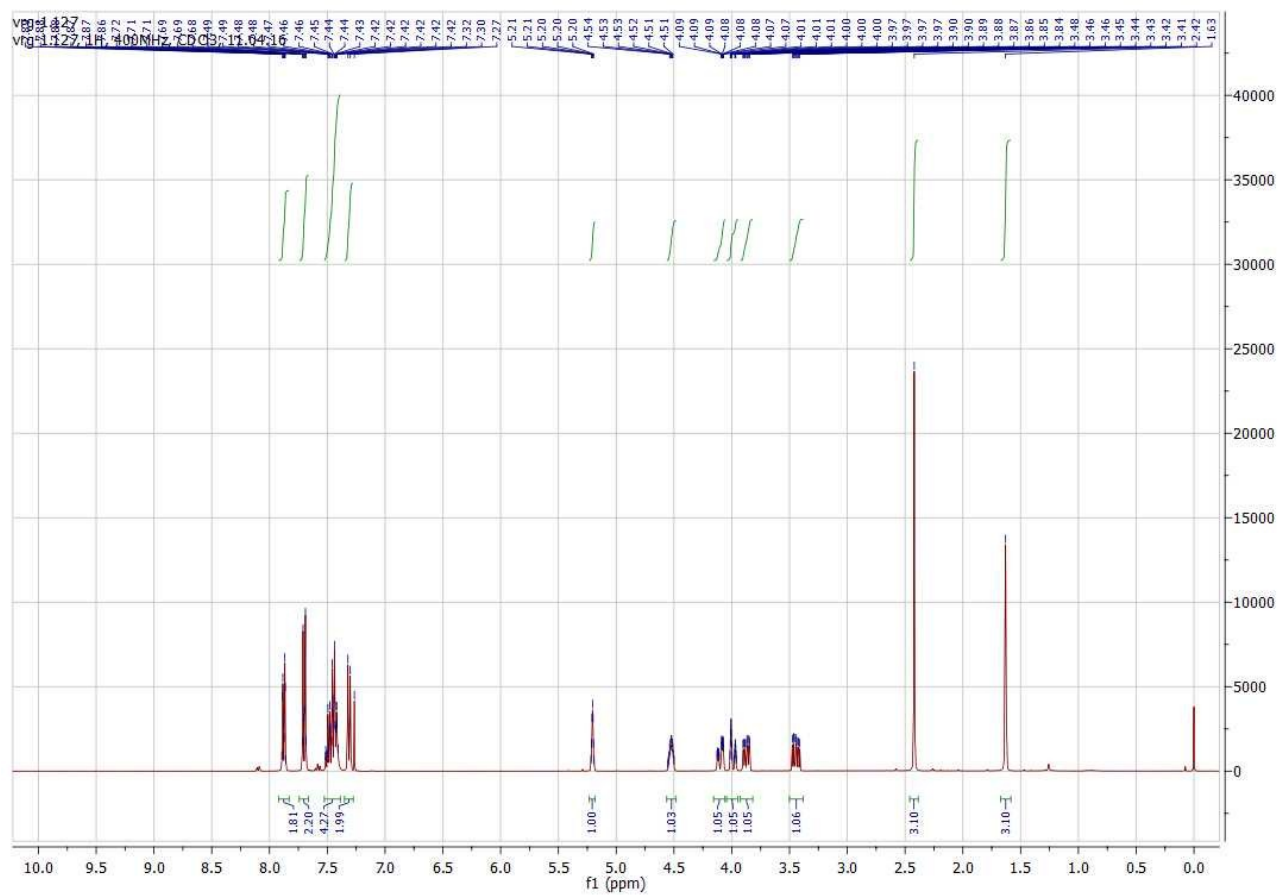

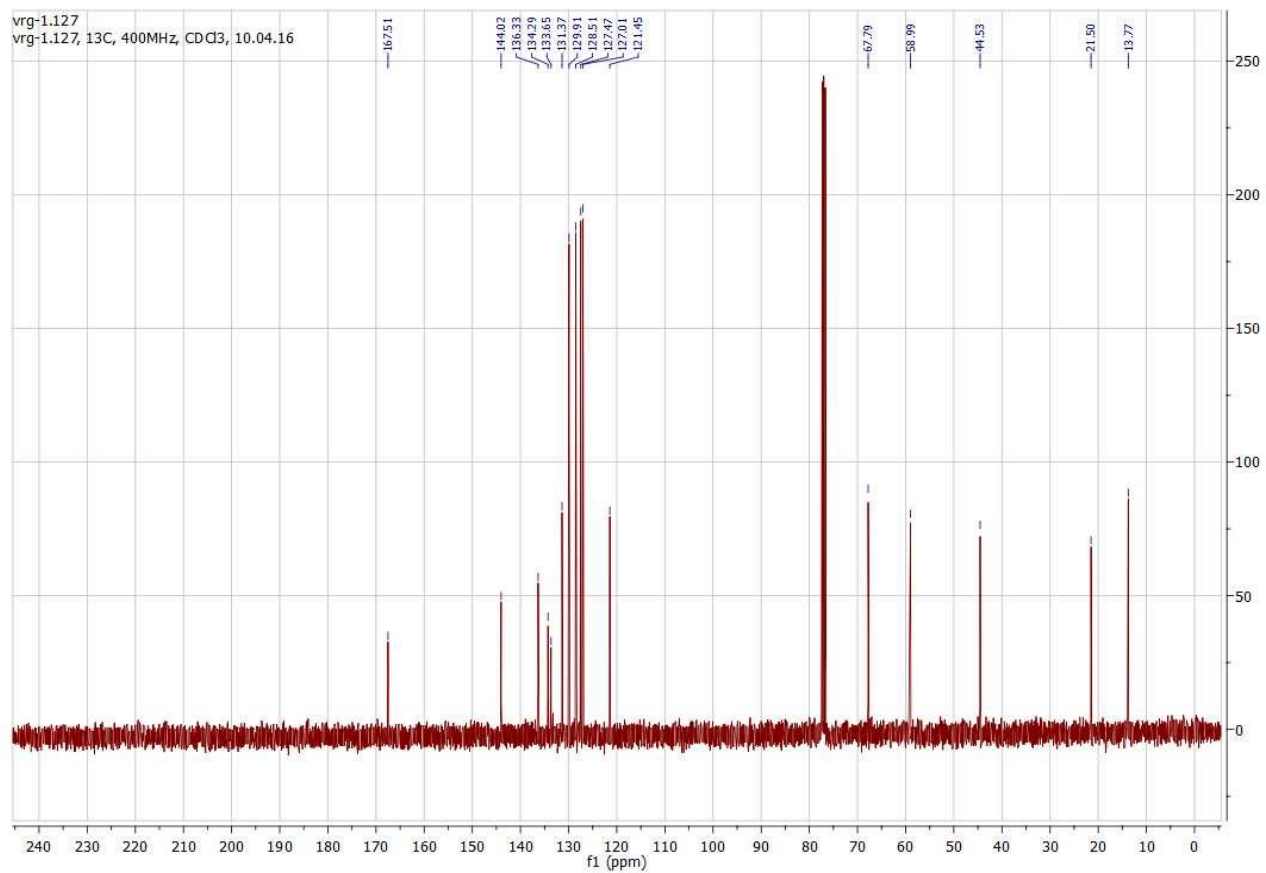

<sup>1</sup>H NMR and <sup>13</sup>C{<sup>1</sup>H} NMR spectra of **10f**

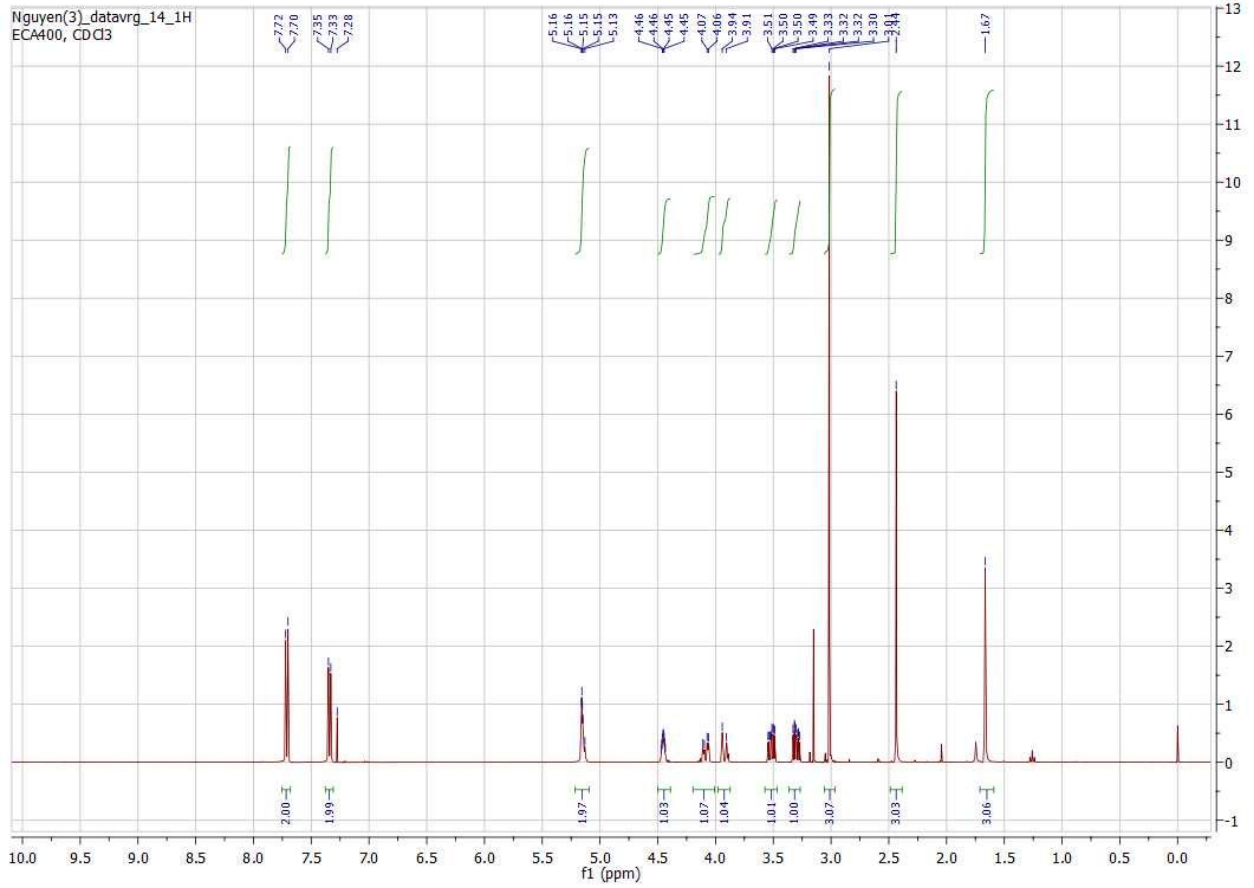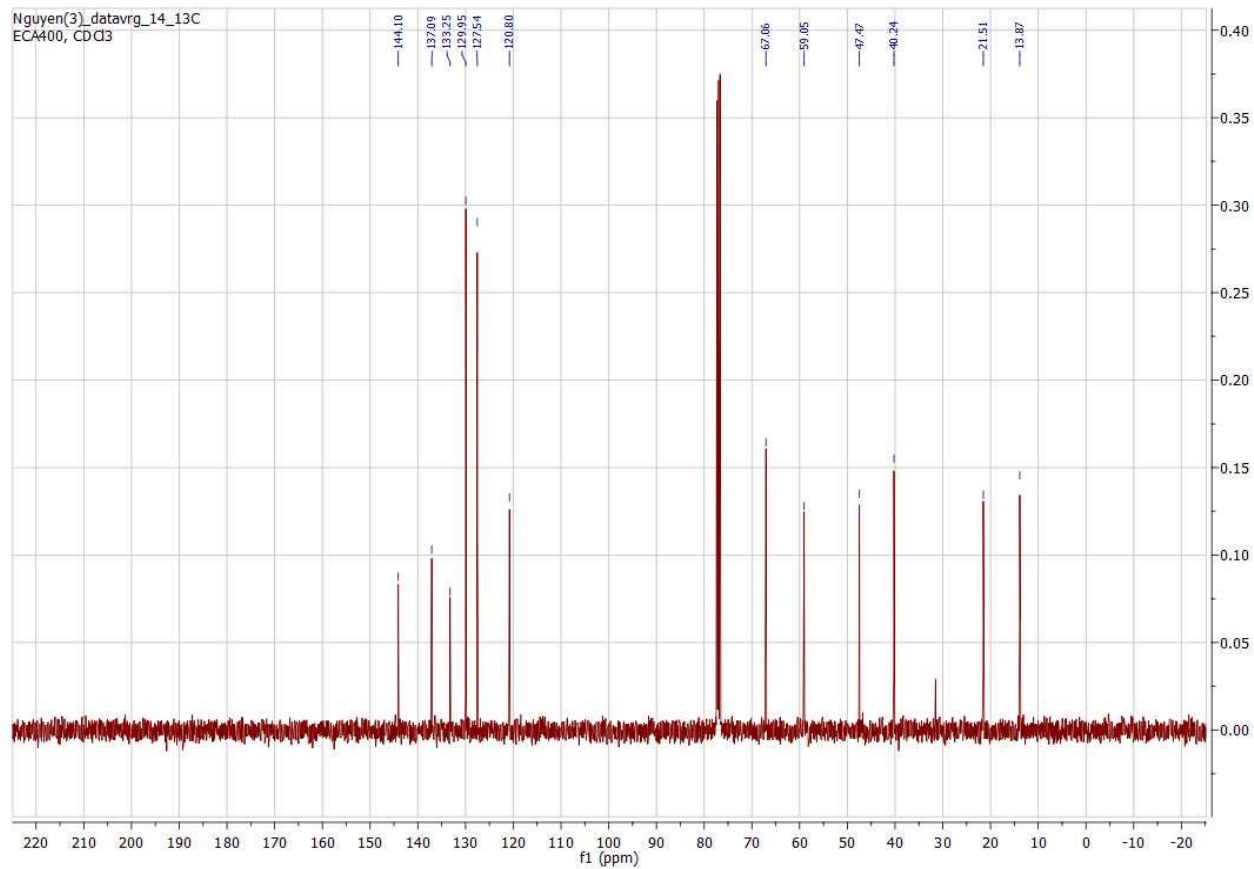

$^1\text{H}$  NMR and  $^{13}\text{C}\{^1\text{H}\}$  NMR spectra of **10g**

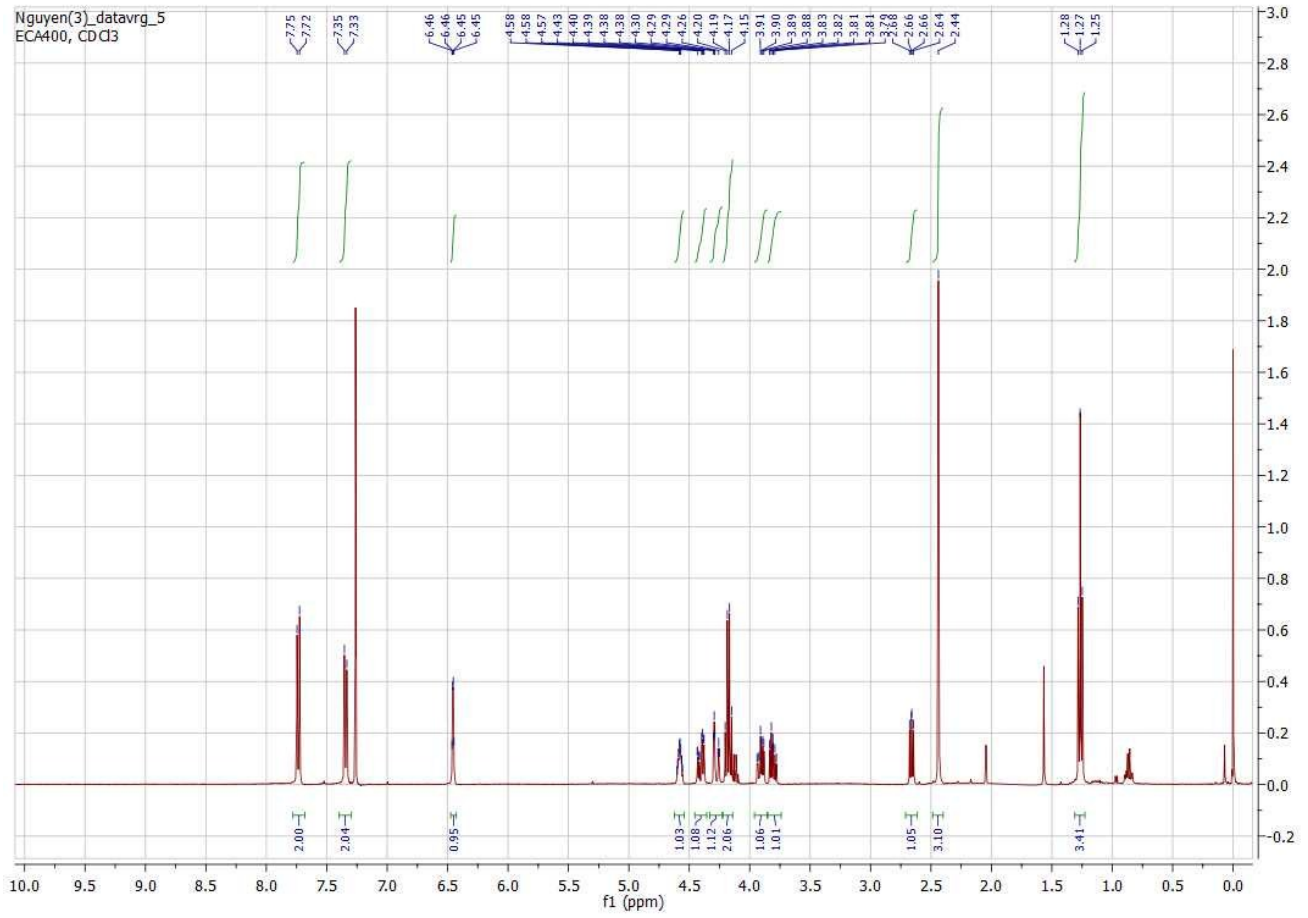

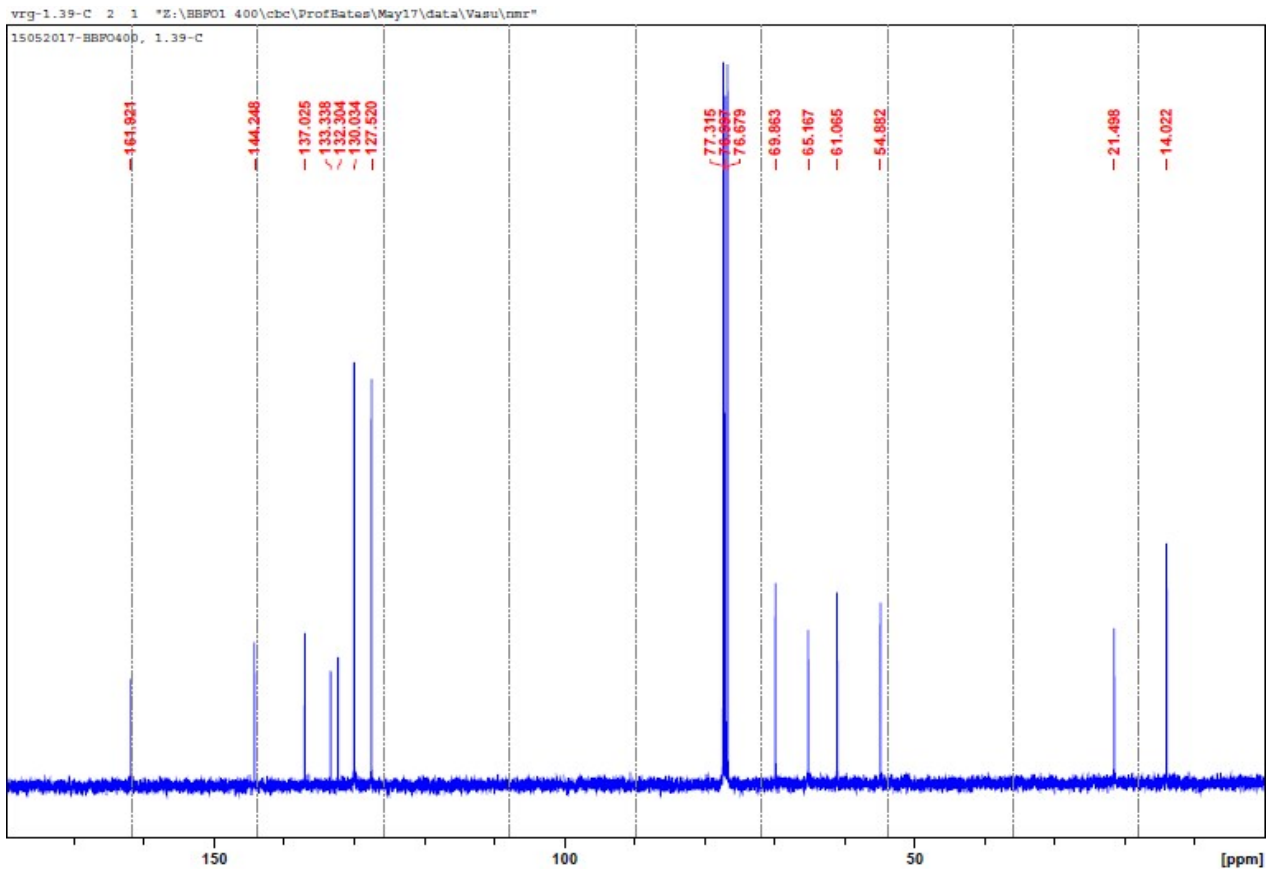

$^1\text{H}$  NMR and  $^{13}\text{C}\{^1\text{H}\}$  NMR spectra of **12**

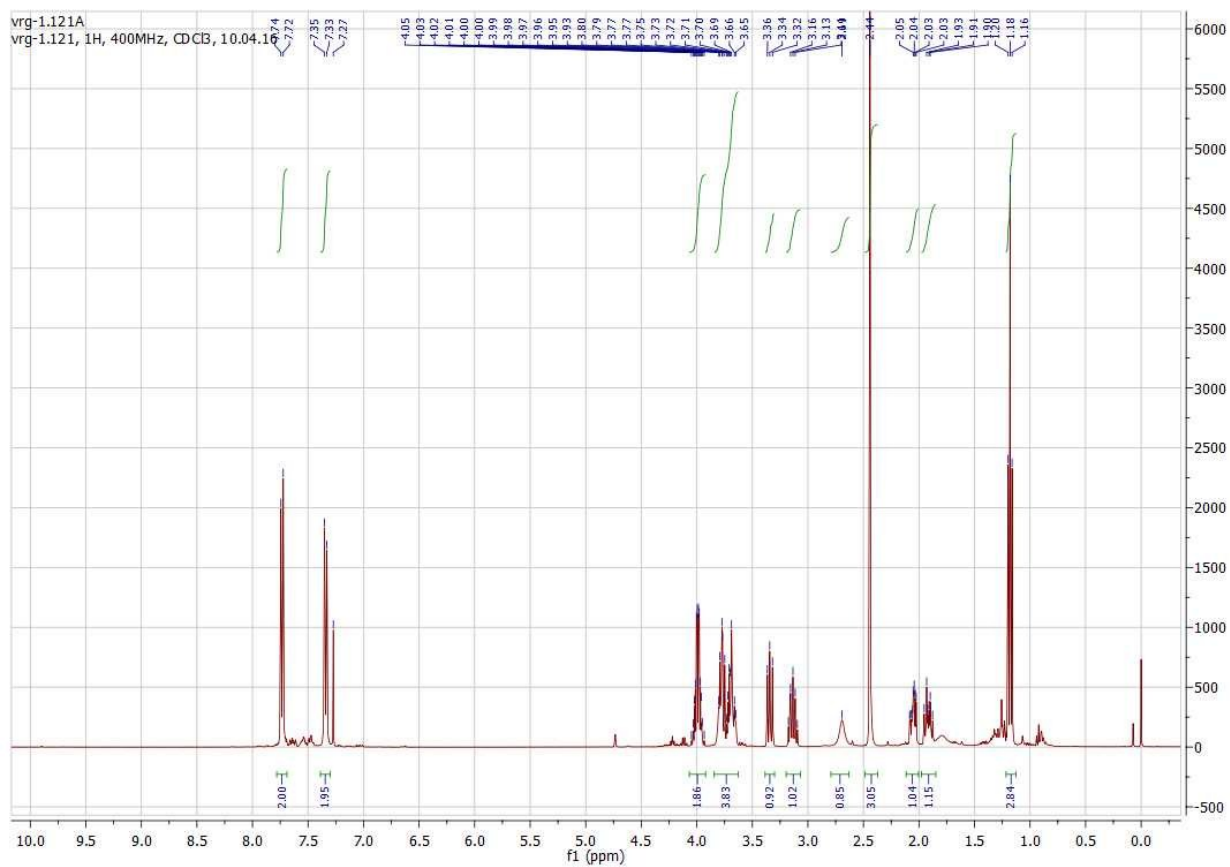

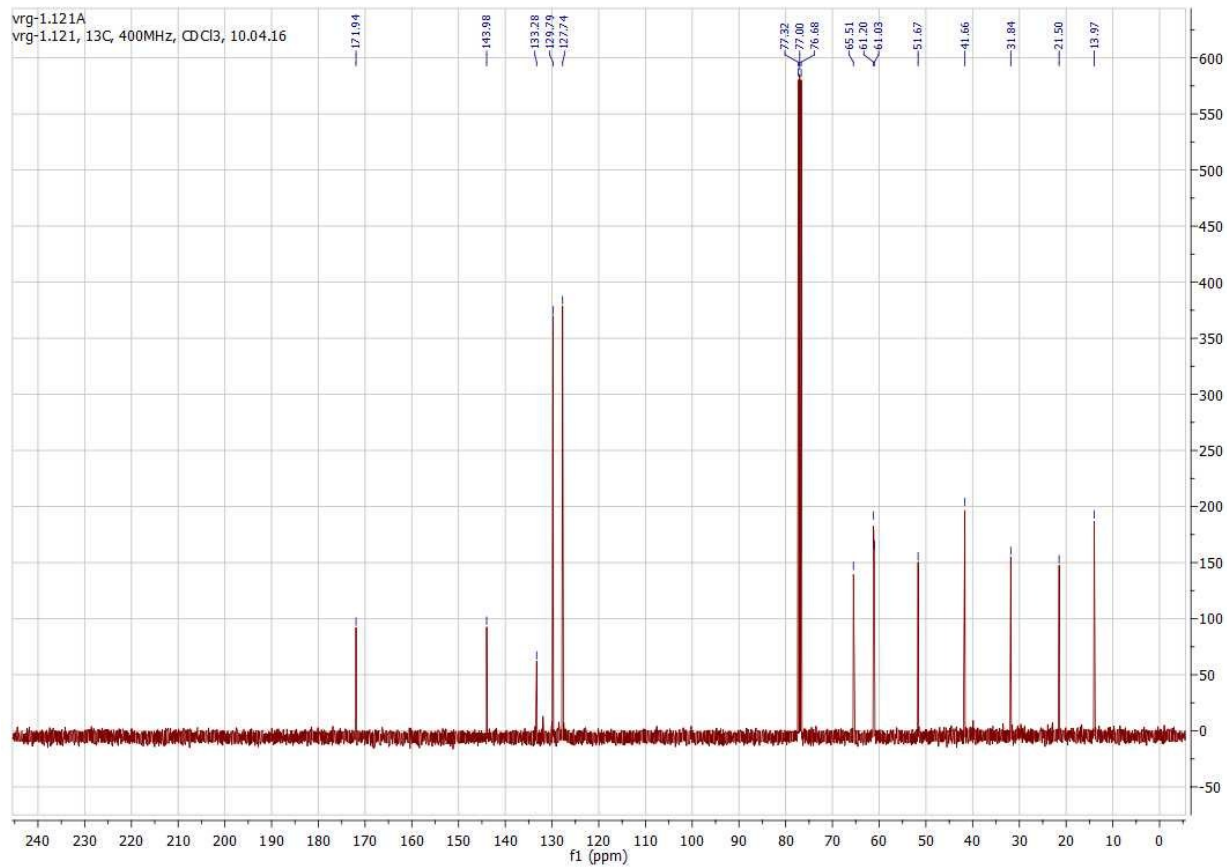

<sup>1</sup>H NMR and <sup>13</sup>C {<sup>1</sup>H} NMR spectra of **13**

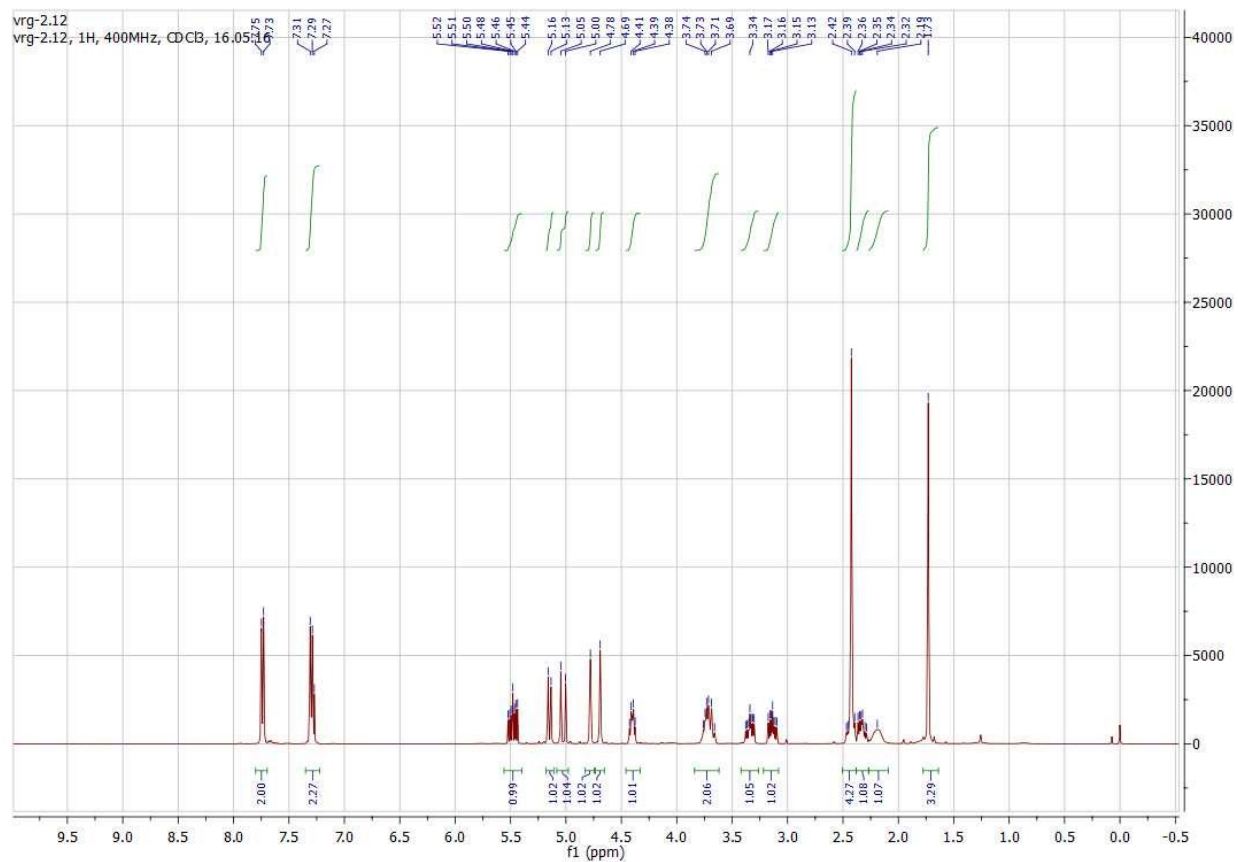



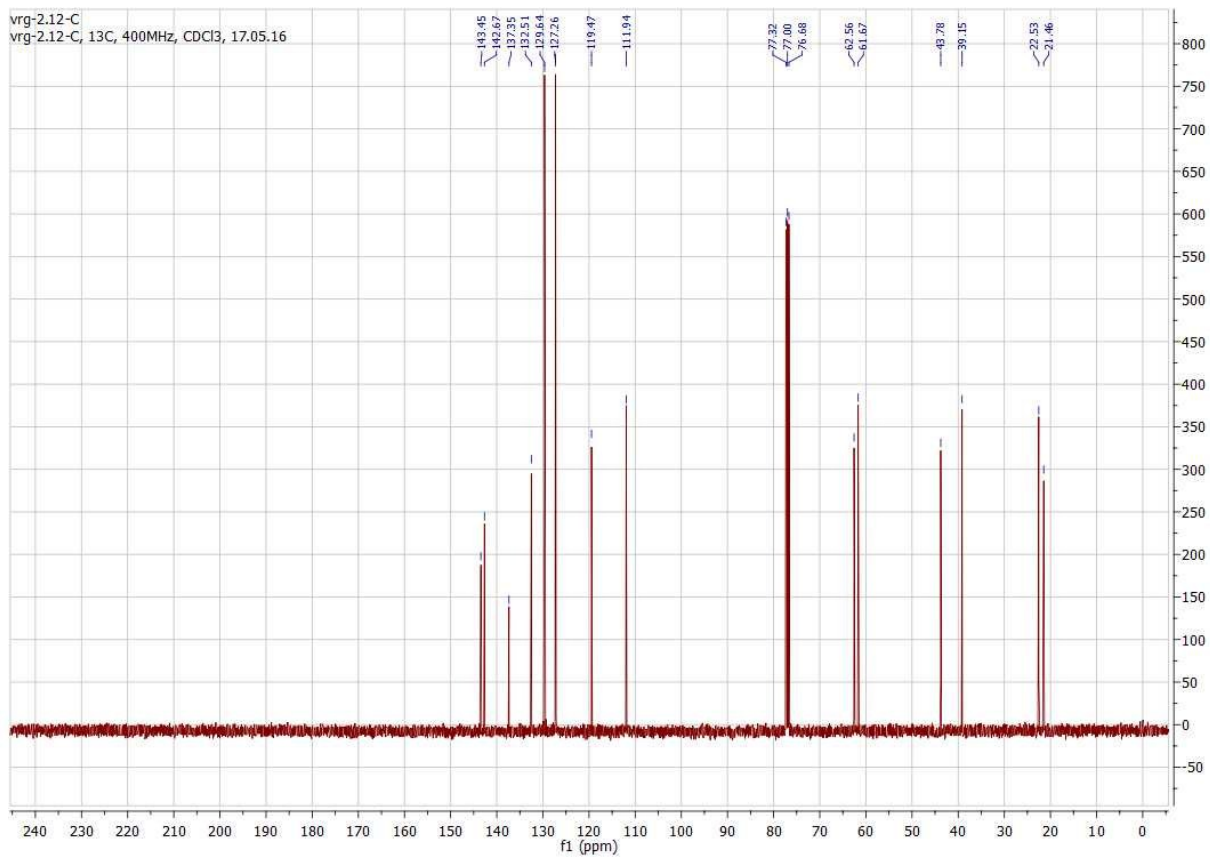

<sup>1</sup>H NMR and <sup>13</sup>C {<sup>1</sup>H} NMR spectra of 17

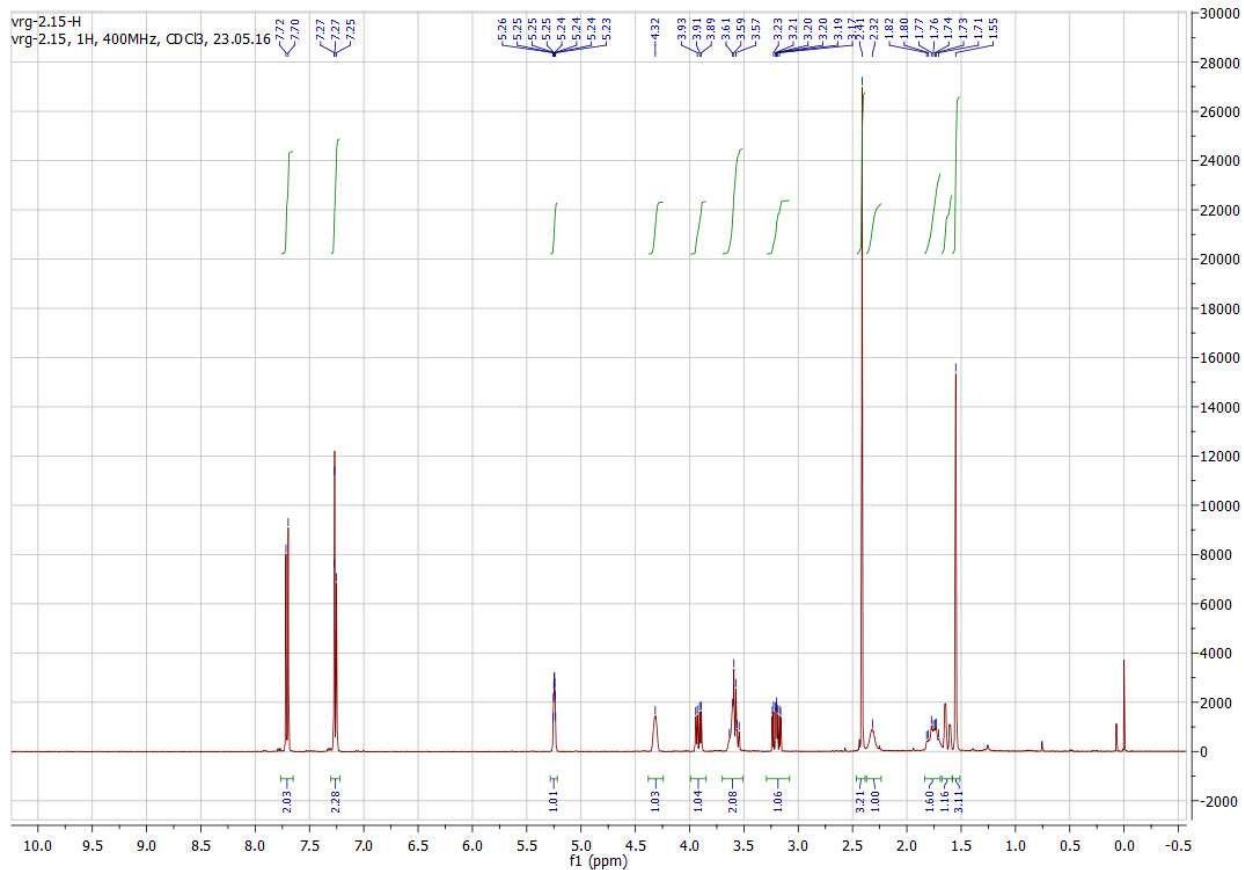

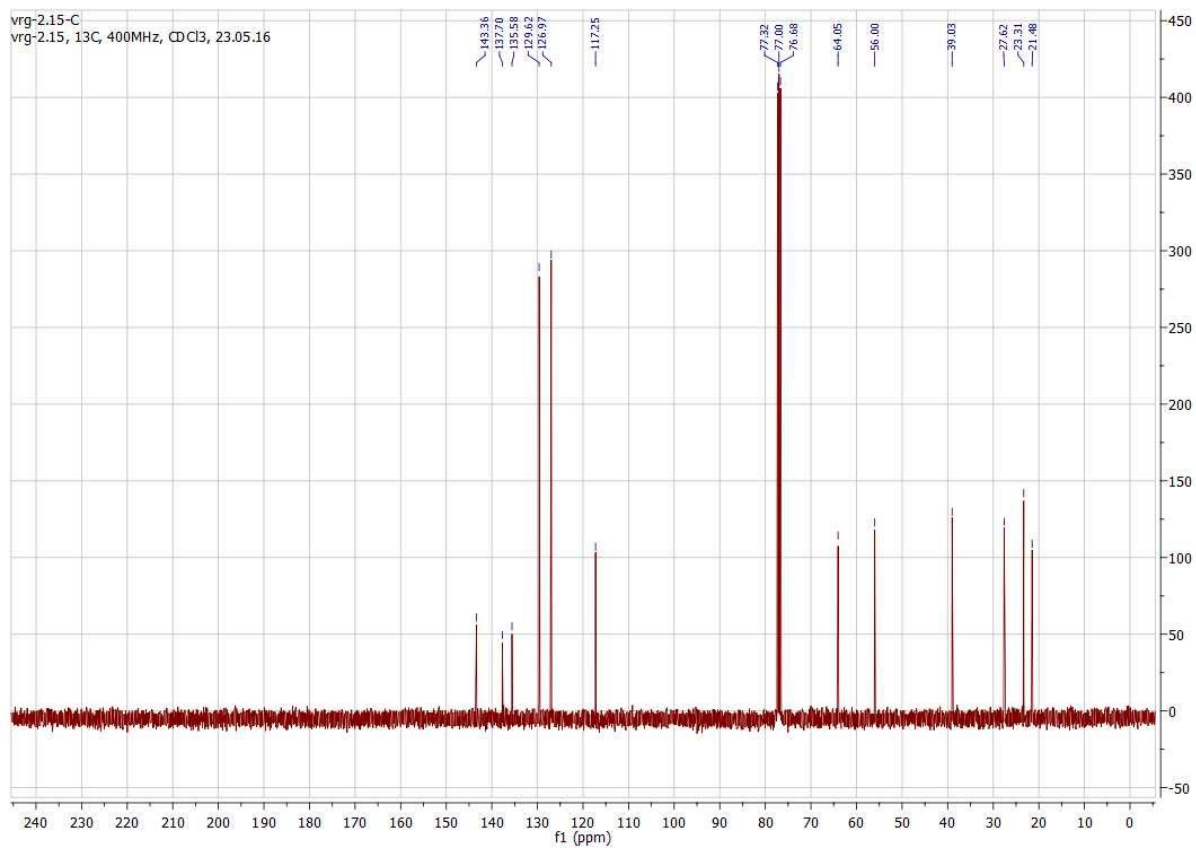

$^1\text{H}$  NMR and  $^{13}\text{C}\{^1\text{H}\}$  NMR spectra of **18**

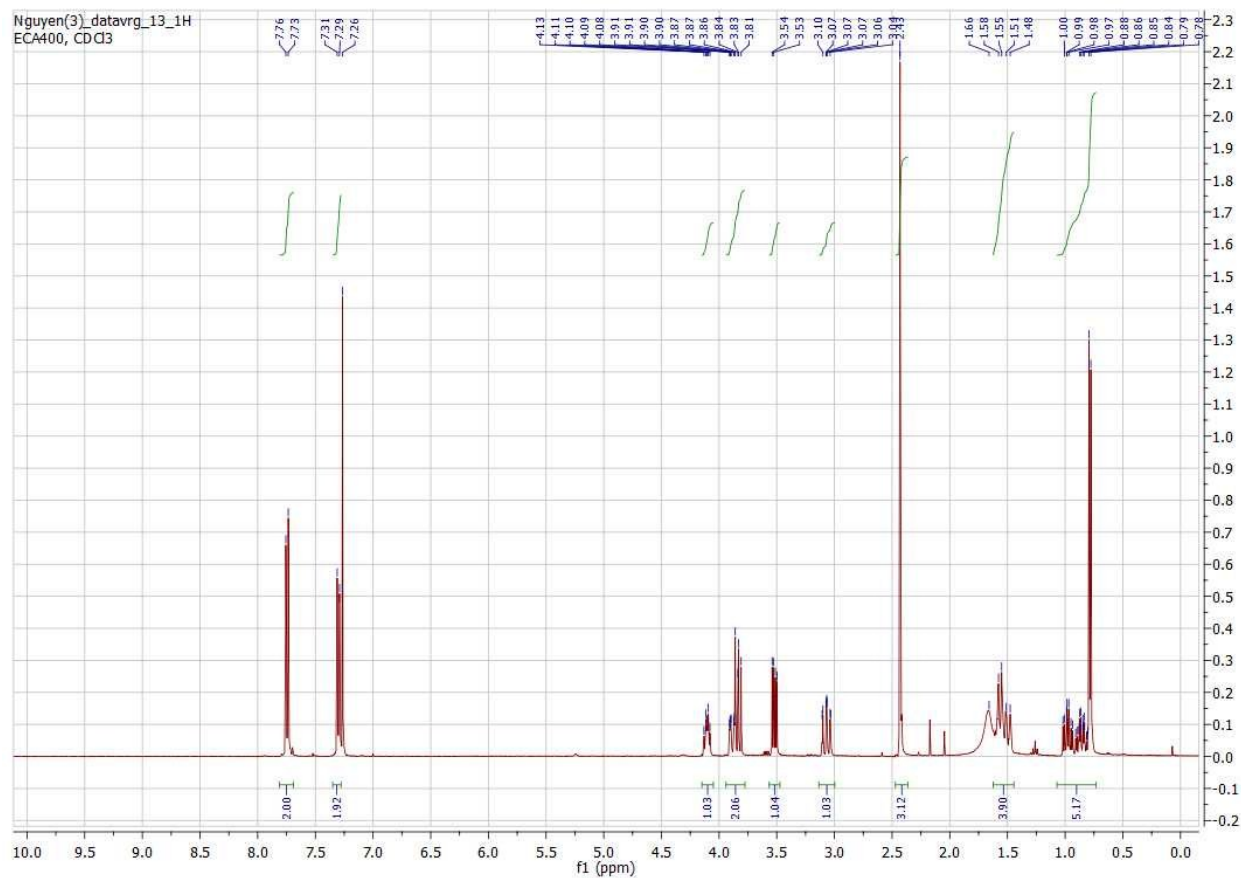

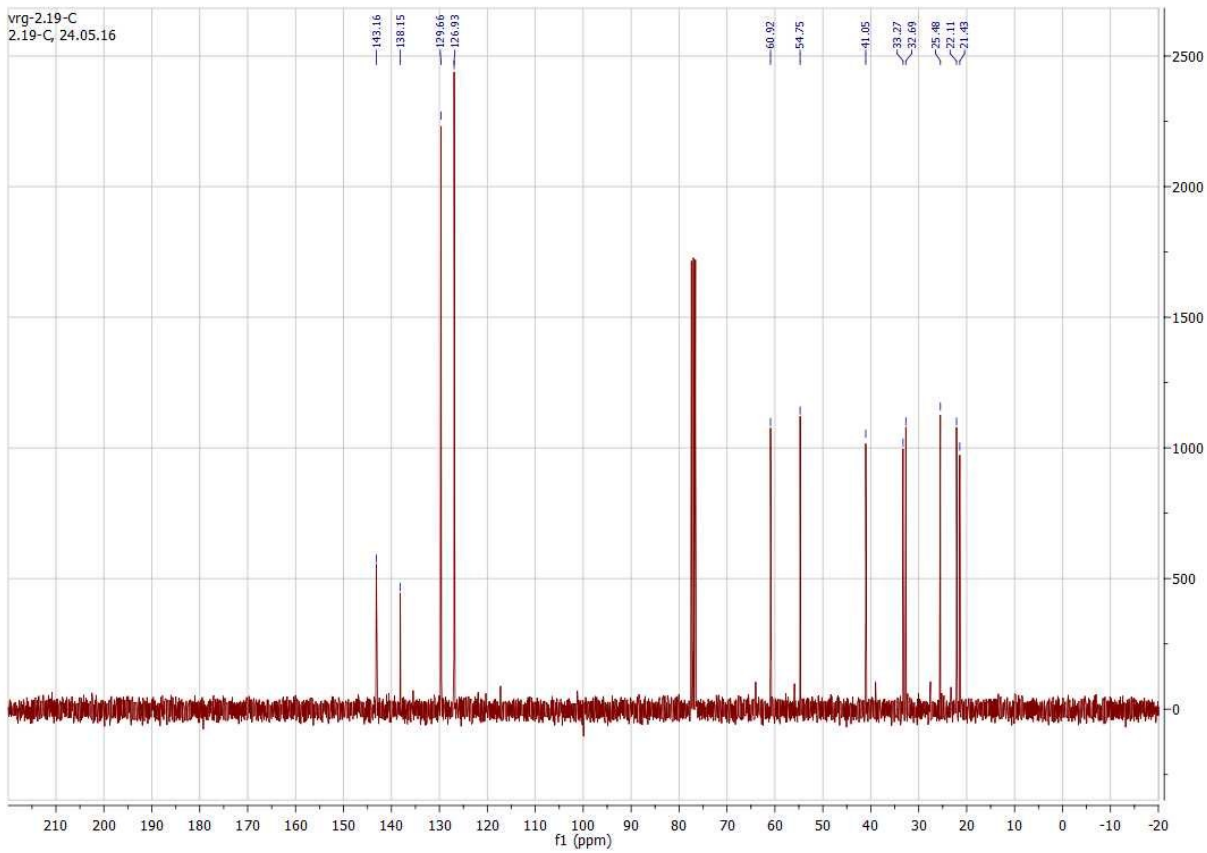

$^1\text{H}$  NMR and  $^{13}\text{C}\{^1\text{H}\}$  NMR spectra of **19**

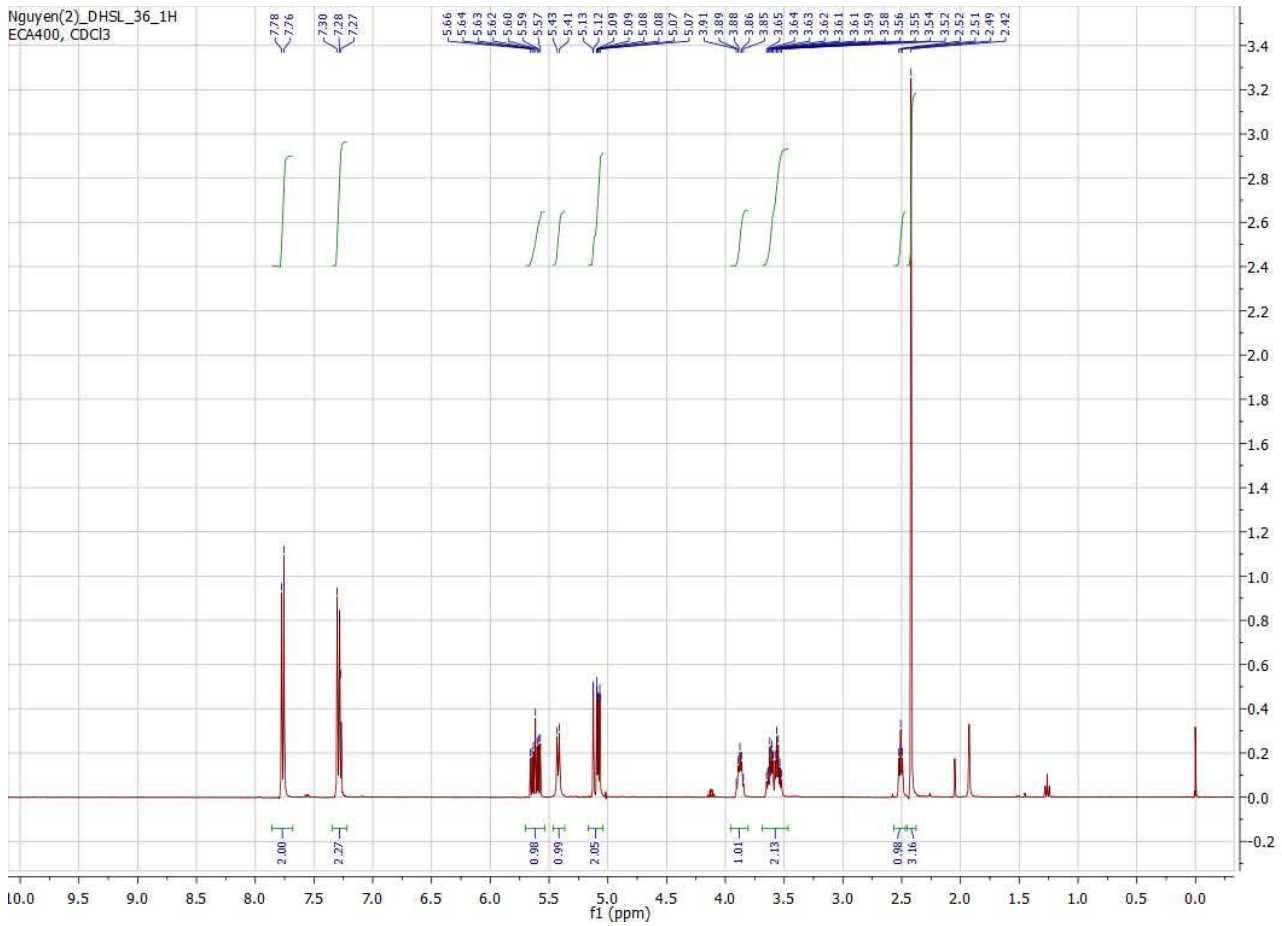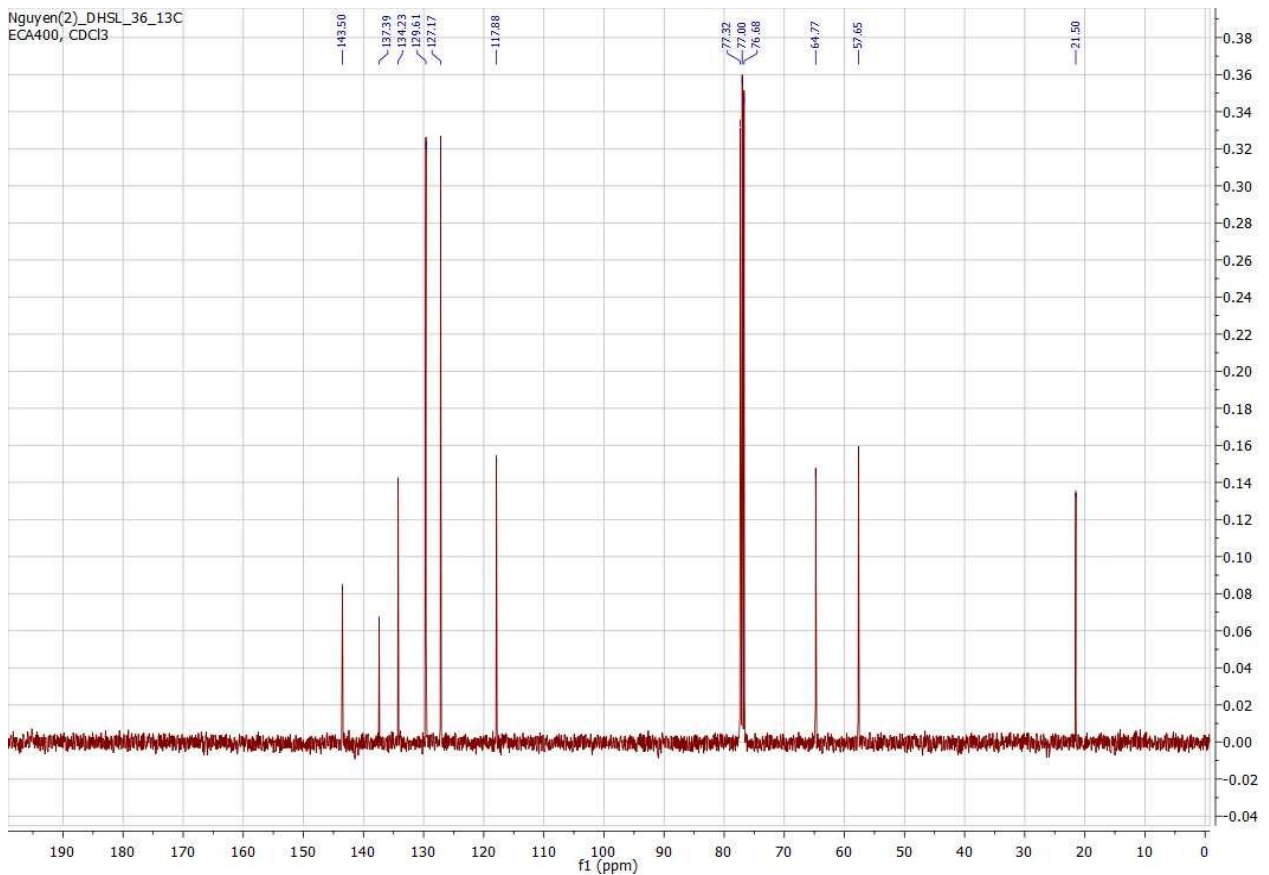

$^1\text{H}$  NMR and  $^{13}\text{C}\{^1\text{H}\}$  NMR spectra of 7

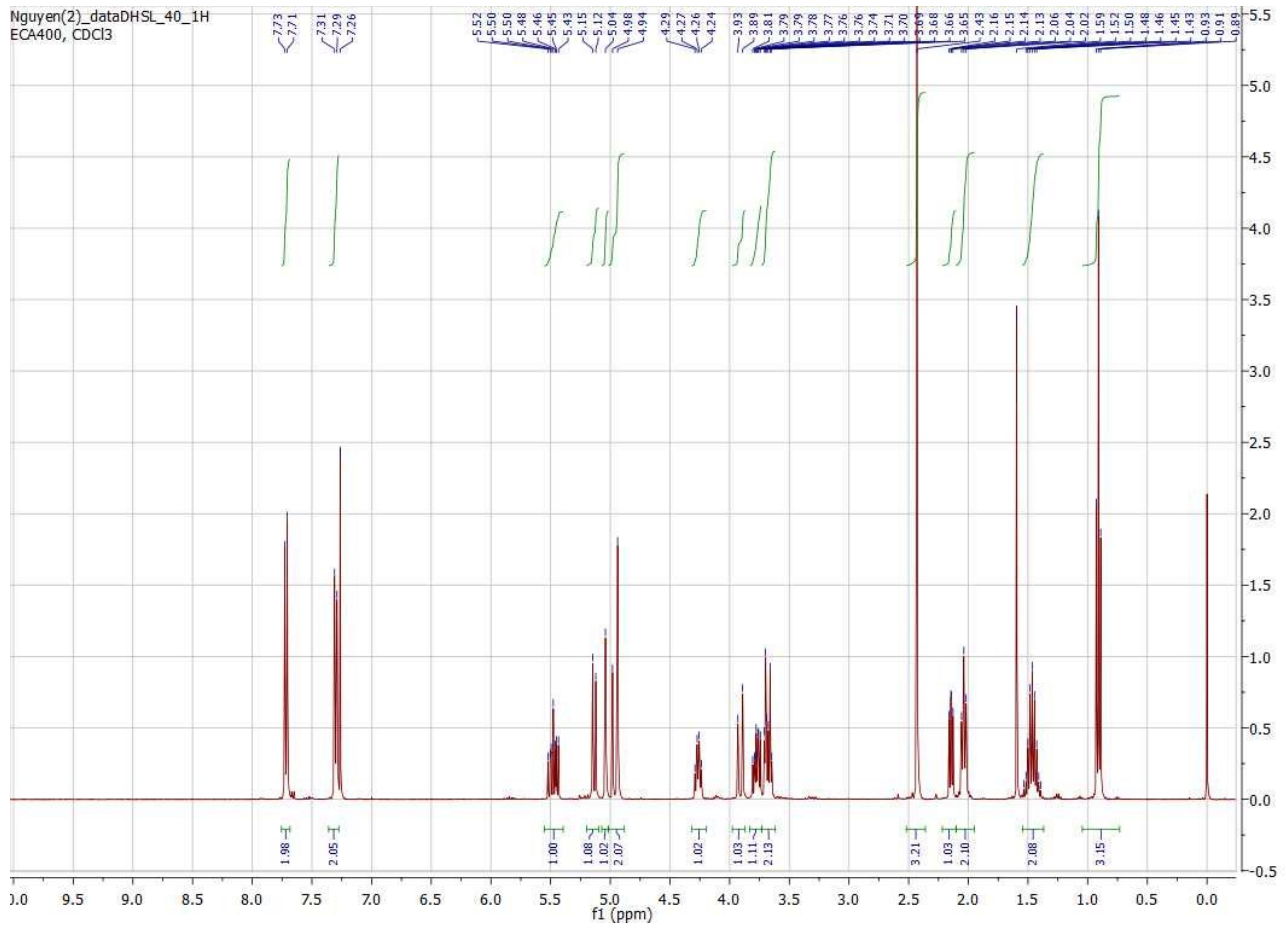

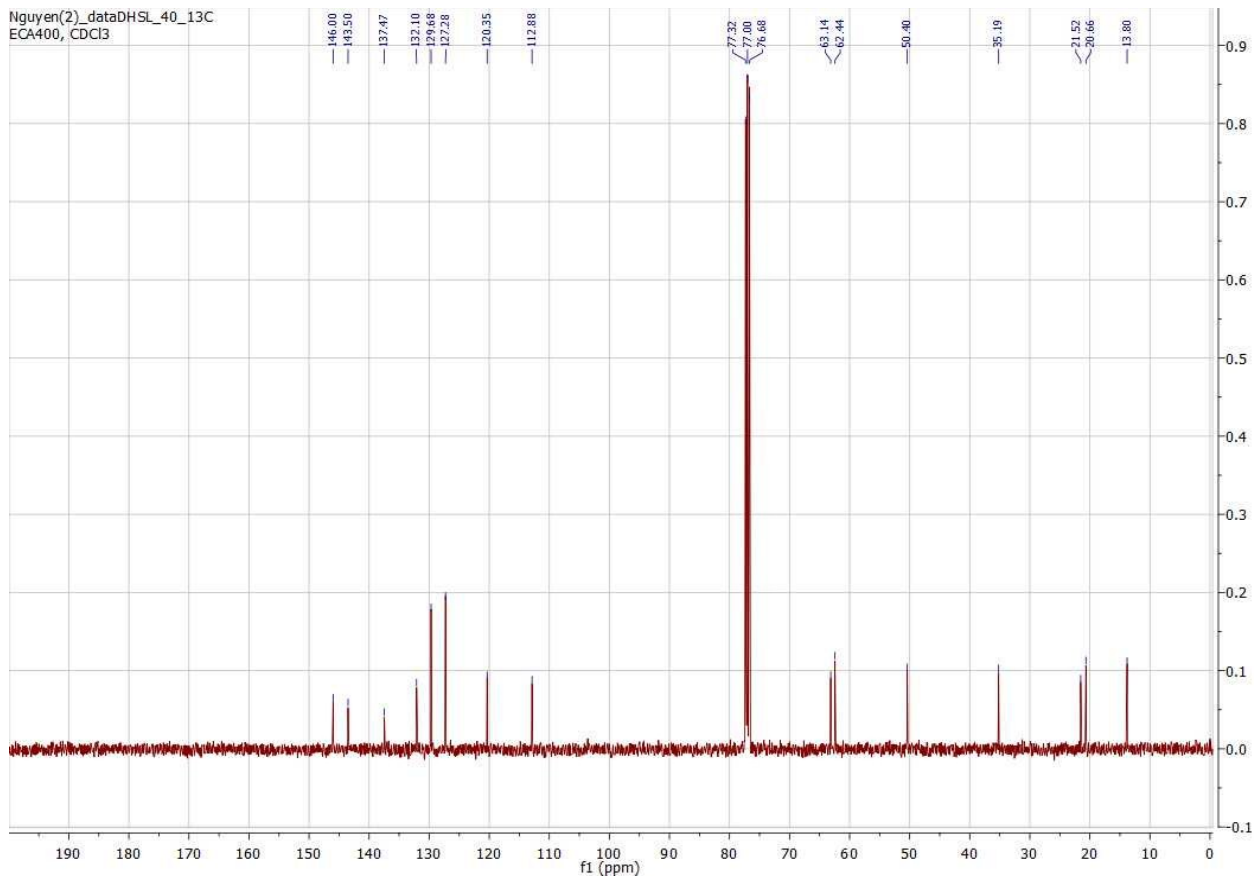

<sup>1</sup>H NMR and <sup>13</sup>C{<sup>1</sup>H} NMR spectra of **9c**

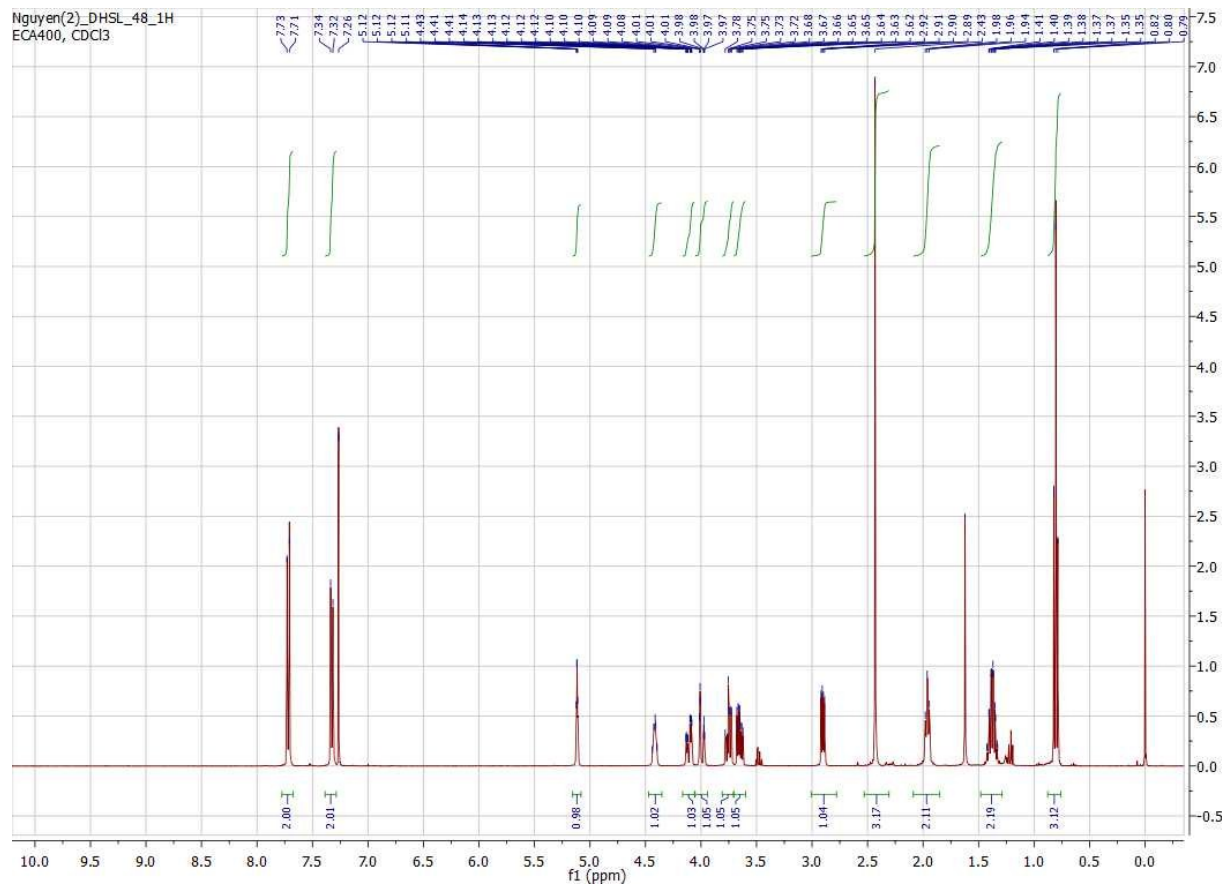

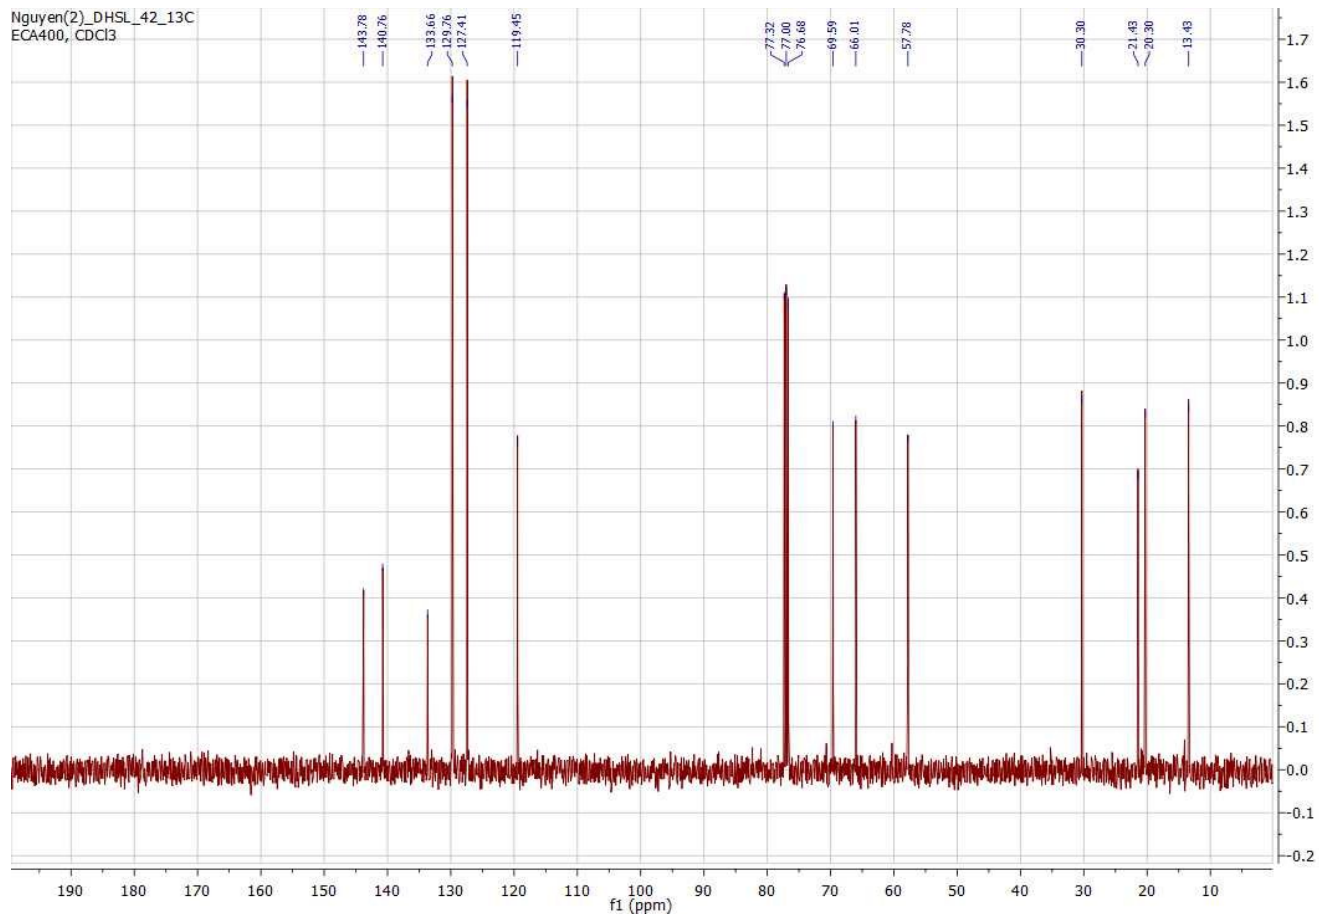

$^1\text{H}$  NMR and  $^{13}\text{C}\{^1\text{H}\}$  NMR spectra of **14**

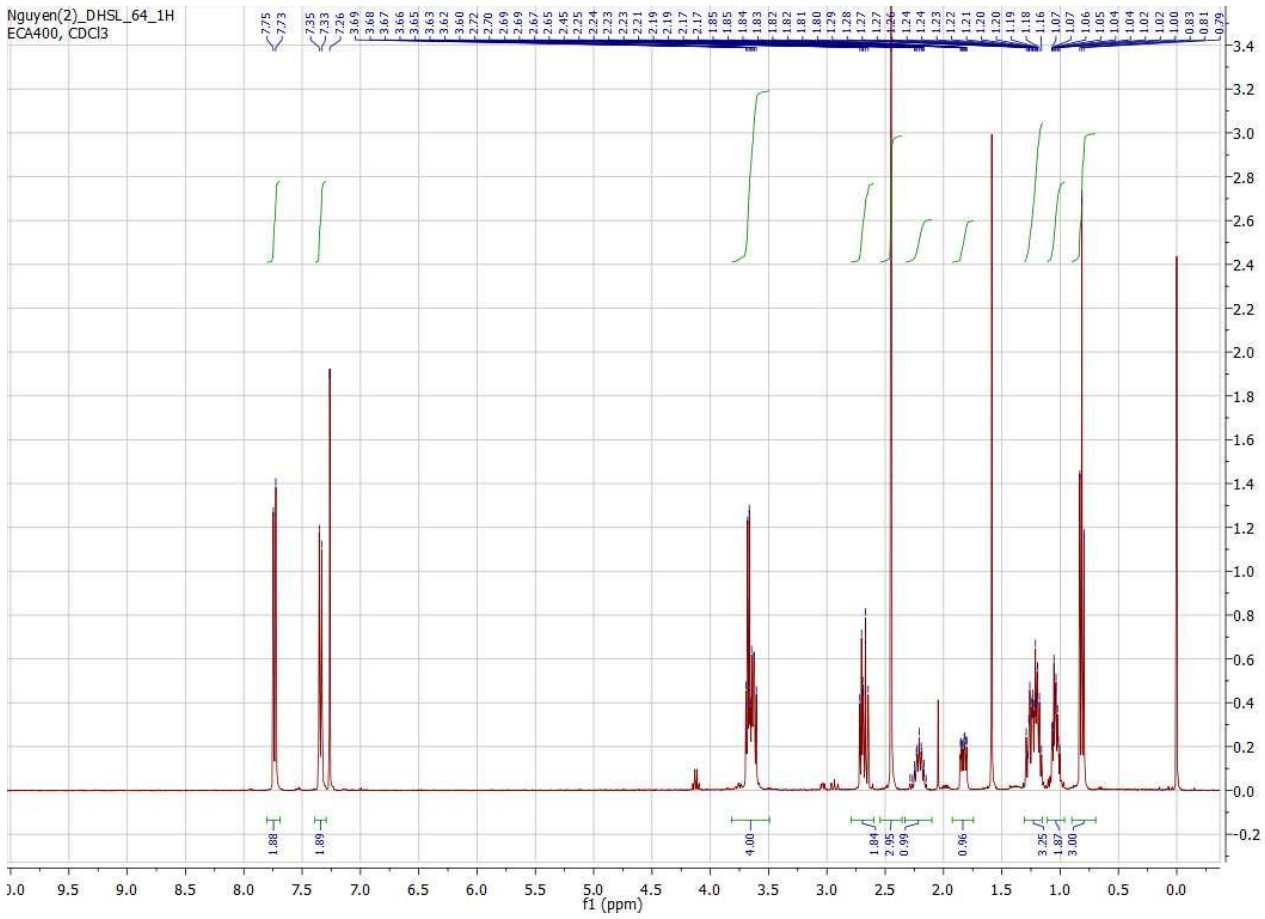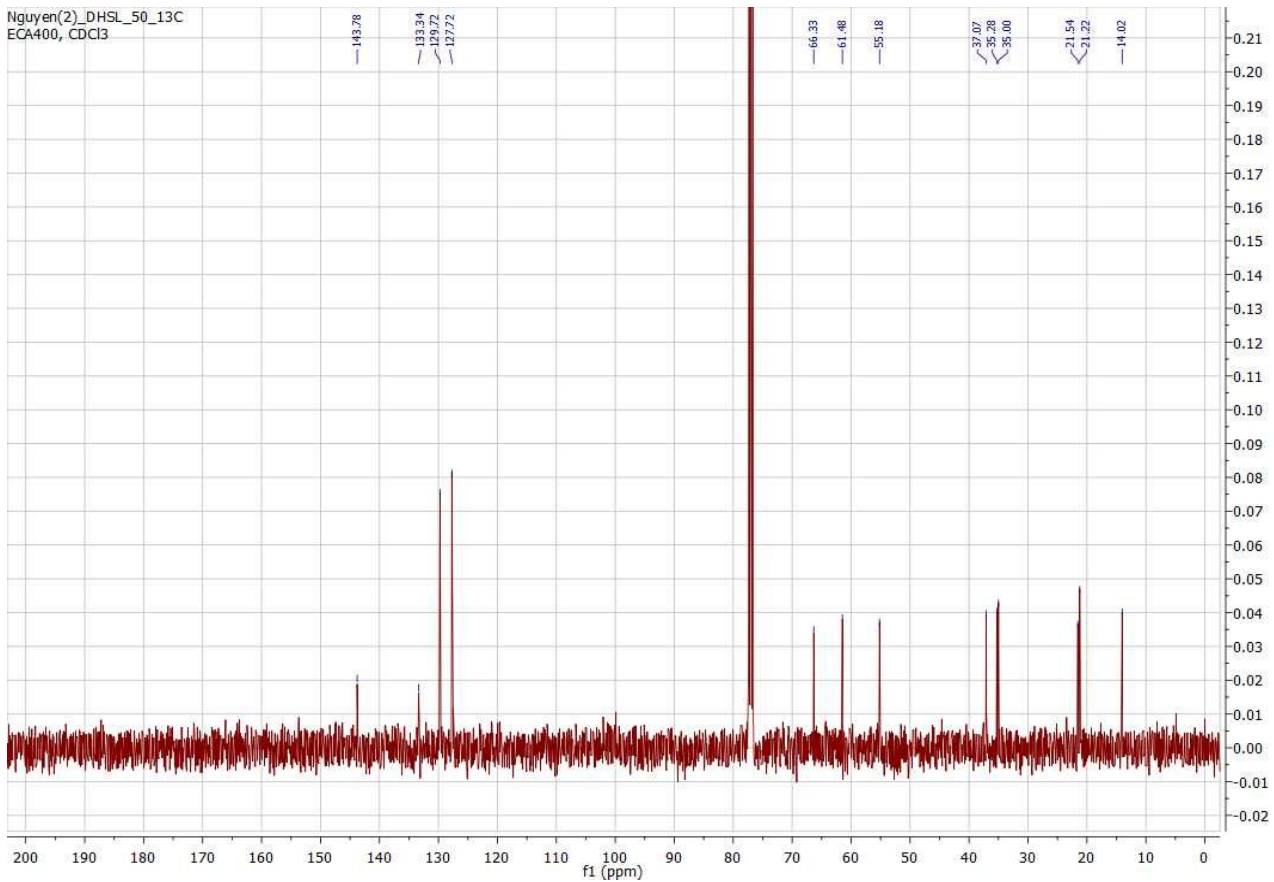



$^1\text{H}$  NMR and  $^{13}\text{C}\{^1\text{H}\}$  NMR spectra of **15**

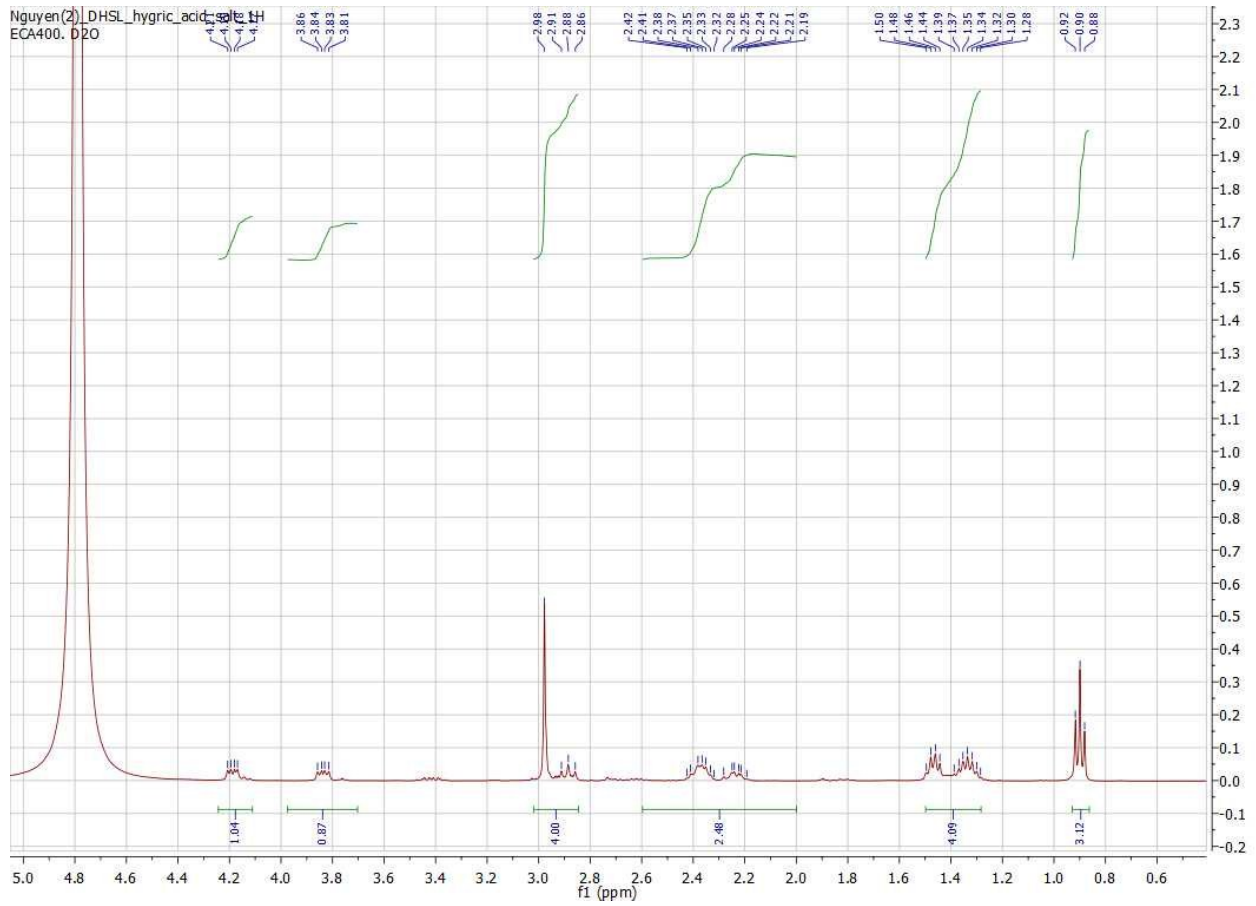

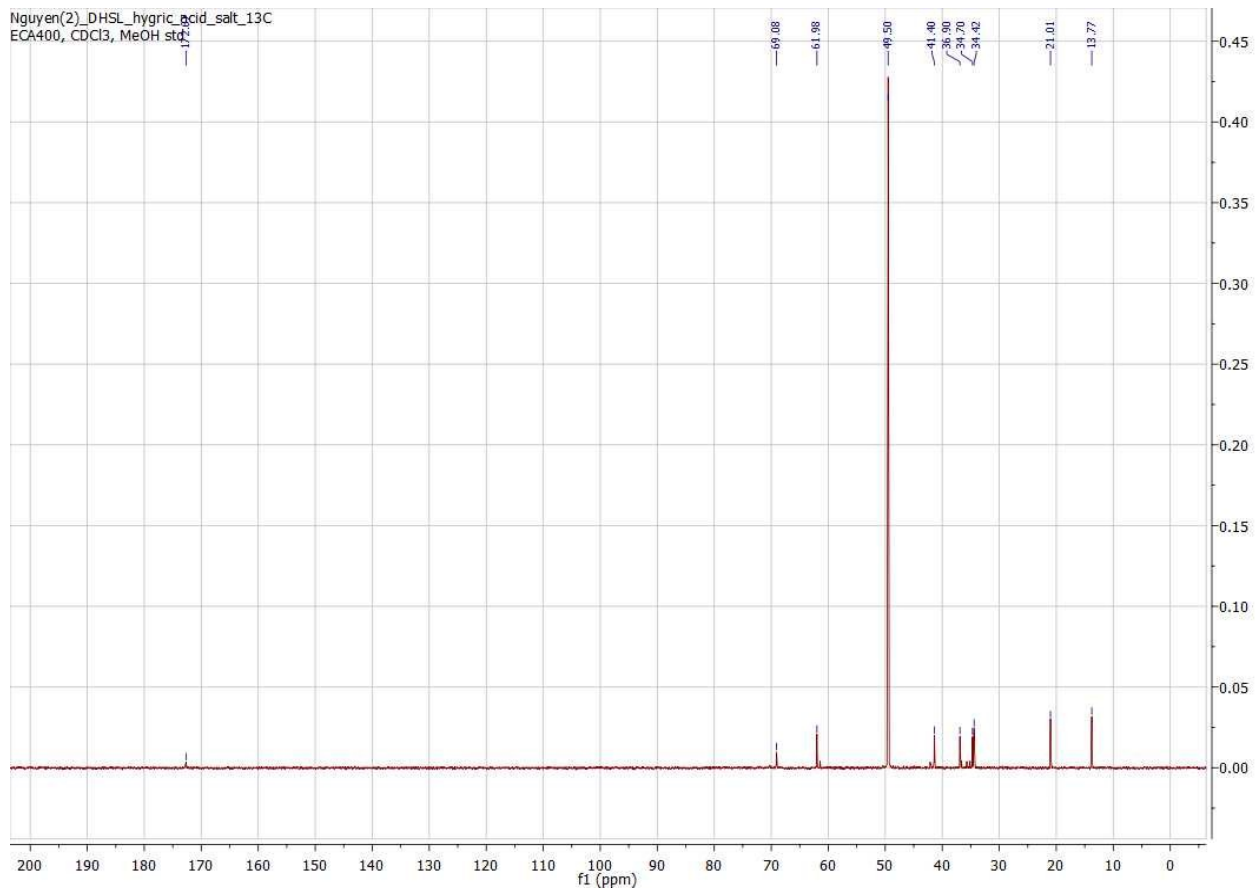

$^1\text{H}$  NMR and  $^{13}\text{C}\{^1\text{H}\}$  NMR spectra of hygric acid **1**

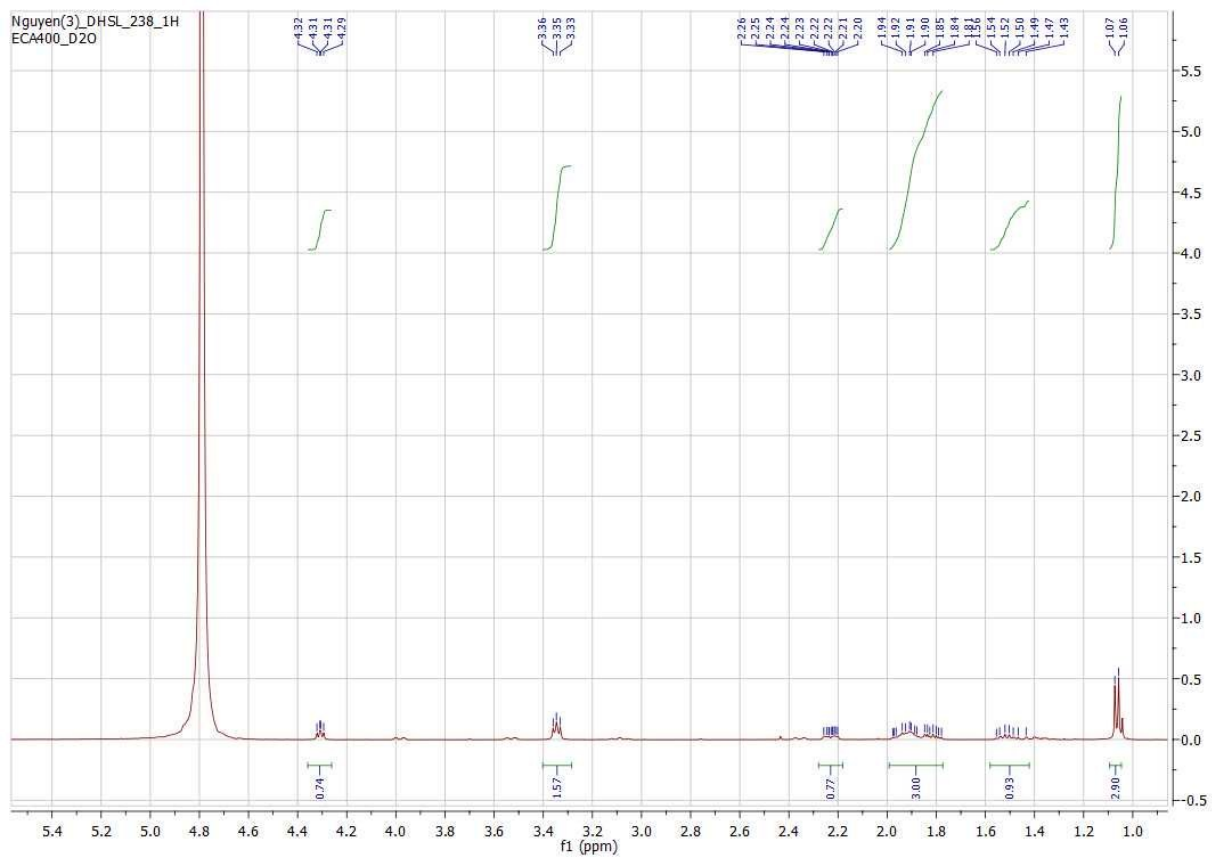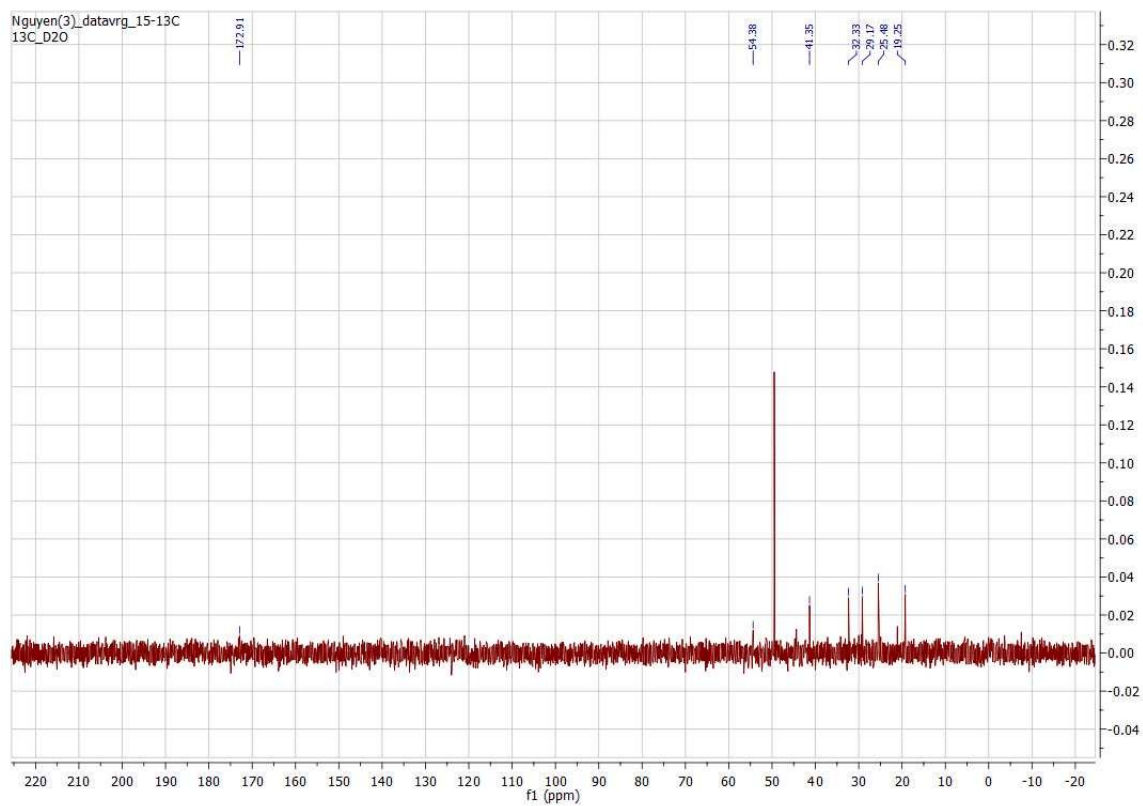

$^1\text{H}$  NMR and  $^{13}\text{C}\{^1\text{H}\}$  NMR spectra of pipecolic acid **3**

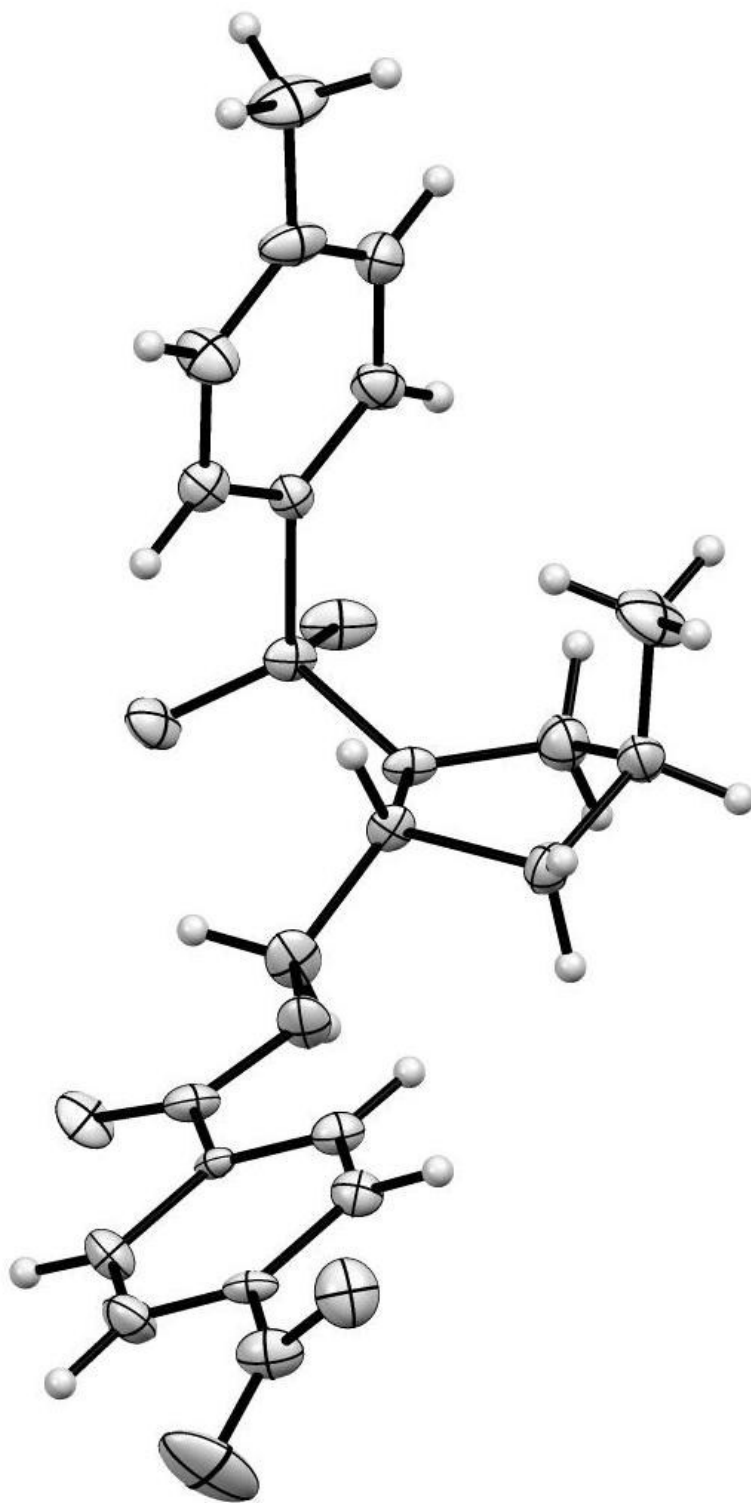

X-ray structure of pyrrolidine **11a** (*p*-nitrobenzoate ester)

ORTEP, 50% probability

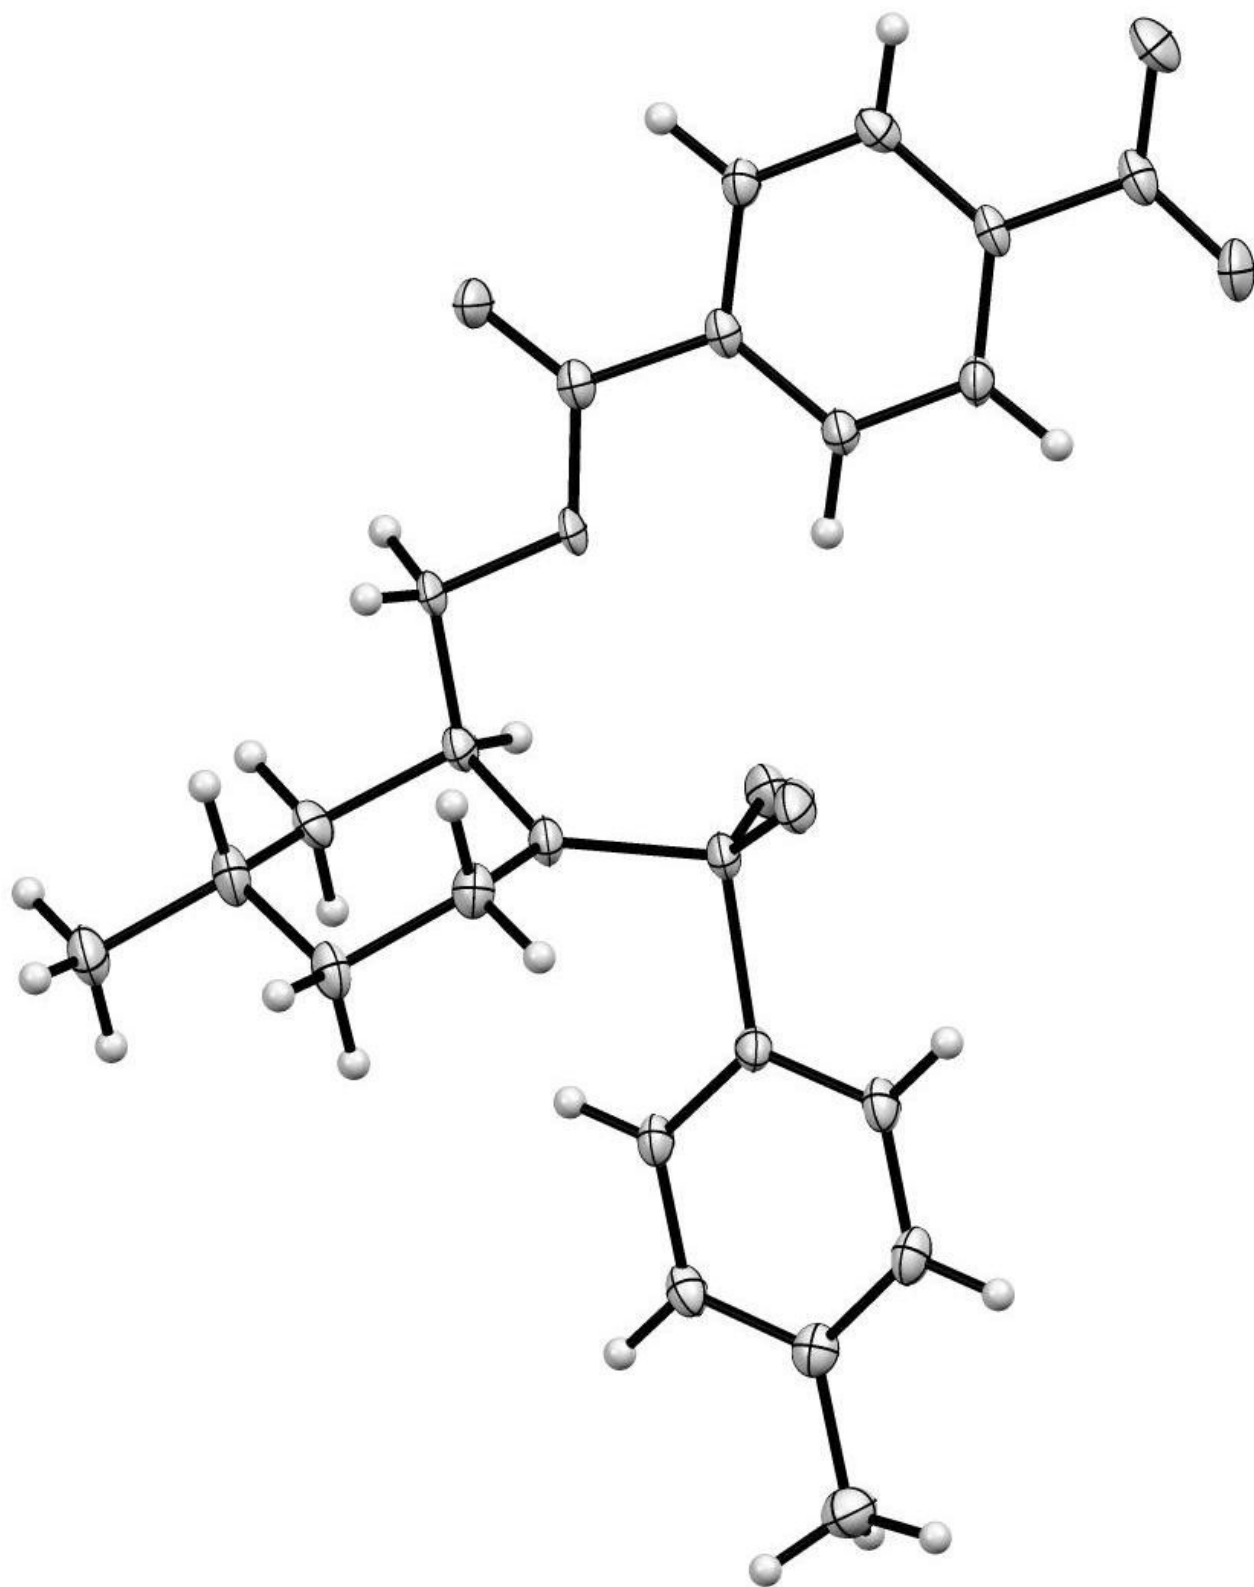

X-ray structure of piperidine **19** (*p*-nitrobenzoate ester)

ORTEP, 50% probability



**Sample and crystal data for pyrrolidine 11a.**

|                               |                                                                 |                |
|-------------------------------|-----------------------------------------------------------------|----------------|
| <b>Chemical formula</b>       | C <sub>20</sub> H <sub>22</sub> N <sub>2</sub> O <sub>6</sub> S |                |
| <b>Grown from</b>             | CH <sub>2</sub> Cl <sub>2</sub> :hexane 1:4                     |                |
| <b>Formula weight</b>         | 418.45 g/mol                                                    |                |
| <b>Temperature</b>            | 153(2) K                                                        |                |
| <b>Wavelength</b>             | 0.71073 Å                                                       |                |
| <b>Crystal size</b>           | 0.100 x 0.140 x 0.200 mm                                        |                |
| <b>Crystal habit</b>          | colorless block                                                 |                |
| <b>Crystal system</b>         | triclinic                                                       |                |
| <b>Space group</b>            | P -1                                                            |                |
| <b>Unit cell dimensions</b>   | a = 7.613(3) Å                                                  | α = 77.323(5)° |
|                               | b = 15.188(5) Å                                                 | β = 84.333(4)° |
|                               | c = 17.464(6) Å                                                 | γ = 89.849(5)° |
| <b>Volume</b>                 | 1960.1(11) Å <sup>3</sup>                                       |                |
| <b>Z</b>                      | 4                                                               |                |
| <b>Density (calculated)</b>   | 1.418 g/cm <sup>3</sup>                                         |                |
| <b>Absorption coefficient</b> | 0.206 mm <sup>-1</sup>                                          |                |
| <b>F(000)</b>                 | 880                                                             |                |

**Data collection and structure refinement for pyrrolidine 11a.**

|                                            |                                                                                     |  |
|--------------------------------------------|-------------------------------------------------------------------------------------|--|
| <b>Theta range for data collection</b>     | 1.20 to 25.49°                                                                      |  |
| <b>Index ranges</b>                        | -9<=h<=9, -17<=k<=18, -21<=l<=21                                                    |  |
| <b>Reflections collected</b>               | 7228                                                                                |  |
| <b>Independent reflections</b>             | 7228 [R(int) = 0.0602]                                                              |  |
| <b>Coverage of independent reflections</b> | 99.2%                                                                               |  |
| <b>Absorption correction</b>               | Multi-Scan                                                                          |  |
| <b>Max. and min. transmission</b>          | 0.9800 and 0.9600                                                                   |  |
| <b>Structure solution technique</b>        | direct methods                                                                      |  |
| <b>Structure solution program</b>          | XS, VERSION 2013/1                                                                  |  |
| <b>Refinement method</b>                   | Full-matrix least-squares on F <sup>2</sup>                                         |  |
| <b>Refinement program</b>                  | SHELXL-2014/7 (Sheldrick, 2014)                                                     |  |
| <b>Function minimized</b>                  | Σ w(F <sub>o</sub> <sup>2</sup> - F <sub>c</sub> <sup>2</sup> ) <sup>2</sup>        |  |
| <b>Data / restraints / parameters</b>      | 7228 / 60 / 528                                                                     |  |
| <b>Goodness-of-fit on F<sup>2</sup></b>    | 1.151                                                                               |  |
| <b>Final R indices</b>                     | 5504 data; I>2σ(I) R1 = 0.0954, wR2 = 0.2547                                        |  |
|                                            | all data R1 = 0.1190, wR2 = 0.2687                                                  |  |
| <b>Weighting scheme</b>                    | w=1/[σ <sup>2</sup> (F <sub>o</sub> <sup>2</sup> )+(0.1047P) <sup>2</sup> +7.7136P] |  |
| <b>Absolute structure parameter</b>        | 0.0(6)                                                                              |  |
| <b>Largest diff. peak and hole</b>         | 0.788 and -0.803 eÅ <sup>-3</sup>                                                   |  |
| <b>R.M.S. deviation from mean</b>          | 0.151 eÅ <sup>-3</sup>                                                              |  |

**Sample and crystal data for piperidine 19 (*p*-nitrobenzoate ester).**

|                               |                                                                 |                |
|-------------------------------|-----------------------------------------------------------------|----------------|
| <b>Chemical formula</b>       | C <sub>21</sub> H <sub>24</sub> N <sub>2</sub> O <sub>6</sub> S |                |
| <b>Grown from</b>             | CH <sub>2</sub> Cl <sub>2</sub> :hexane 1:4                     |                |
| <b>Formula weight</b>         | 432.48 g/mol                                                    |                |
| <b>Temperature</b>            | 223(2) K                                                        |                |
| <b>Wavelength</b>             | 0.71073 Å                                                       |                |
| <b>Crystal size</b>           | 0.200 x 0.240 x 0.300 mm                                        |                |
| <b>Crystal habit</b>          | colorless block                                                 |                |
| <b>Crystal system</b>         | triclinic                                                       |                |
| <b>Space group</b>            | P -1                                                            |                |
| <b>Unit cell dimensions</b>   | a = 9.5182(15) Å                                                | α = 89.926(4)° |
|                               | b = 9.9604(15) Å                                                | β = 89.896(4)° |
|                               | c = 10.7803(17) Å                                               | γ = 89.878(4)° |
| <b>Volume</b>                 | 1022.0(3) Å <sup>3</sup>                                        |                |
| <b>Z</b>                      | 2                                                               |                |
| <b>Density (calculated)</b>   | 1.405 g/cm <sup>3</sup>                                         |                |
| <b>Absorption coefficient</b> | 0.200 mm <sup>-1</sup>                                          |                |
| <b>F(000)</b>                 | 456                                                             |                |

**Data collection and structure refinement for piperidine 19 (*p*-nitrobenzoate ester).**

|                                            |                                                                                          |  |
|--------------------------------------------|------------------------------------------------------------------------------------------|--|
| <b>Theta range for data collection</b>     | 1.89 to 29.43°                                                                           |  |
| <b>Index ranges</b>                        | -13 ≤ h ≤ 13, -13 ≤ k ≤ 13, -14 ≤ l ≤ 14                                                 |  |
| <b>Reflections collected</b>               | 49336                                                                                    |  |
| <b>Independent reflections</b>             | 5546 [R(int) = 0.1142]                                                                   |  |
| <b>Coverage of independent reflections</b> | 99.0%                                                                                    |  |
| <b>Absorption correction</b>               | Multi-Scan                                                                               |  |
| <b>Max. and min. transmission</b>          | 0.9610 and 0.9420                                                                        |  |
| <b>Structure solution technique</b>        | direct methods                                                                           |  |
| <b>Structure solution program</b>          | XS, VERSION 2013/1                                                                       |  |
| <b>Refinement method</b>                   | Full-matrix least-squares on F <sup>2</sup>                                              |  |
| <b>Refinement program</b>                  | SHELXL-2014/7 (Sheldrick, 2014)                                                          |  |
| <b>Function minimized</b>                  | Σ w(F <sub>o</sub> <sup>2</sup> - F <sub>c</sub> <sup>2</sup> ) <sup>2</sup>             |  |
| <b>Data / restraints / parameters</b>      | 5546 / 0 / 274                                                                           |  |
| <b>Goodness-of-fit on F<sup>2</sup></b>    | 0.947                                                                                    |  |
| <b>Final R indices</b>                     | 4827 data; I > 2σ(I) R1 = 0.0624, wR2 = 0.1522                                           |  |
|                                            | all data R1 = 0.0761, wR2 = 0.1637                                                       |  |
| <b>Weighting scheme</b>                    | w = 1/[σ <sup>2</sup> (F <sub>o</sub> <sup>2</sup> ) + (0.1000P) <sup>2</sup> + 1.2595P] |  |
| <b>Largest diff. peak and hole</b>         | 0.529 and -0.566 e <sup>-</sup> Å <sup>-3</sup>                                          |  |
| <b>R.M.S. deviation from mean</b>          | 0.084 e <sup>-</sup> Å <sup>-3</sup>                                                     |  |
